# Supplementary material for: Cyclodextrins tethered with oligolactides – green synthesis and structural assessment
Source: PubMed Central journal article supplement (PMC5433207; doi:10.3762/bjoc.13.77), 2017-04-26
Supplement: Beilstein_J_Org_Chem-13-779-s001.pdf [file Beilstein_J_Org_Chem-13-779-s001.pdf]

**Supporting Information**  
**for**  
**Cyclodextrins tethered with oligolactides – green synthesis**  
**and structural assessment**

Cristian Peptu<sup>\*1,2</sup>, Mihaela Balan-Porcarasu<sup>2</sup>, Alena Šišková<sup>1</sup>, Ludovít Škultéty<sup>3</sup> and Jaroslav Mosnáček<sup>1</sup>

Address: <sup>1</sup>Polymer Institute of Slovak Academy of Sciences, Dúbravská cesta 9, 84541 Bratislava, Slovakia, <sup>2</sup>“Petru Poni” Institute of Macromolecular Chemistry, Alee Grigore Gica Voda 41A, 700487 Iasi, Romania and <sup>3</sup>Institute of Virology, Biomedical Research Center Slovak Academy of Sciences, Dúbravská cesta 9, 84541 Bratislava, Slovakia

Email: Cristian Peptu - cristian\_peptu@yahoo.com

\*Corresponding author

**Analytical Data**

**Contents**

Liquid chromatography with detection by evaporative light scattering (LC ELSD) and matrix assisted laser desorption ionization mass spectrometry (MALDI-MS) Figures S1–S21 –pages S2–S12

LC with electrospray mass spectrometry (ESI-MS) detection of  $\beta$ -CD-LA S22, S23 – page S13

NMR spectra of CD-LA Figures S24–S44 –pages S14–S34

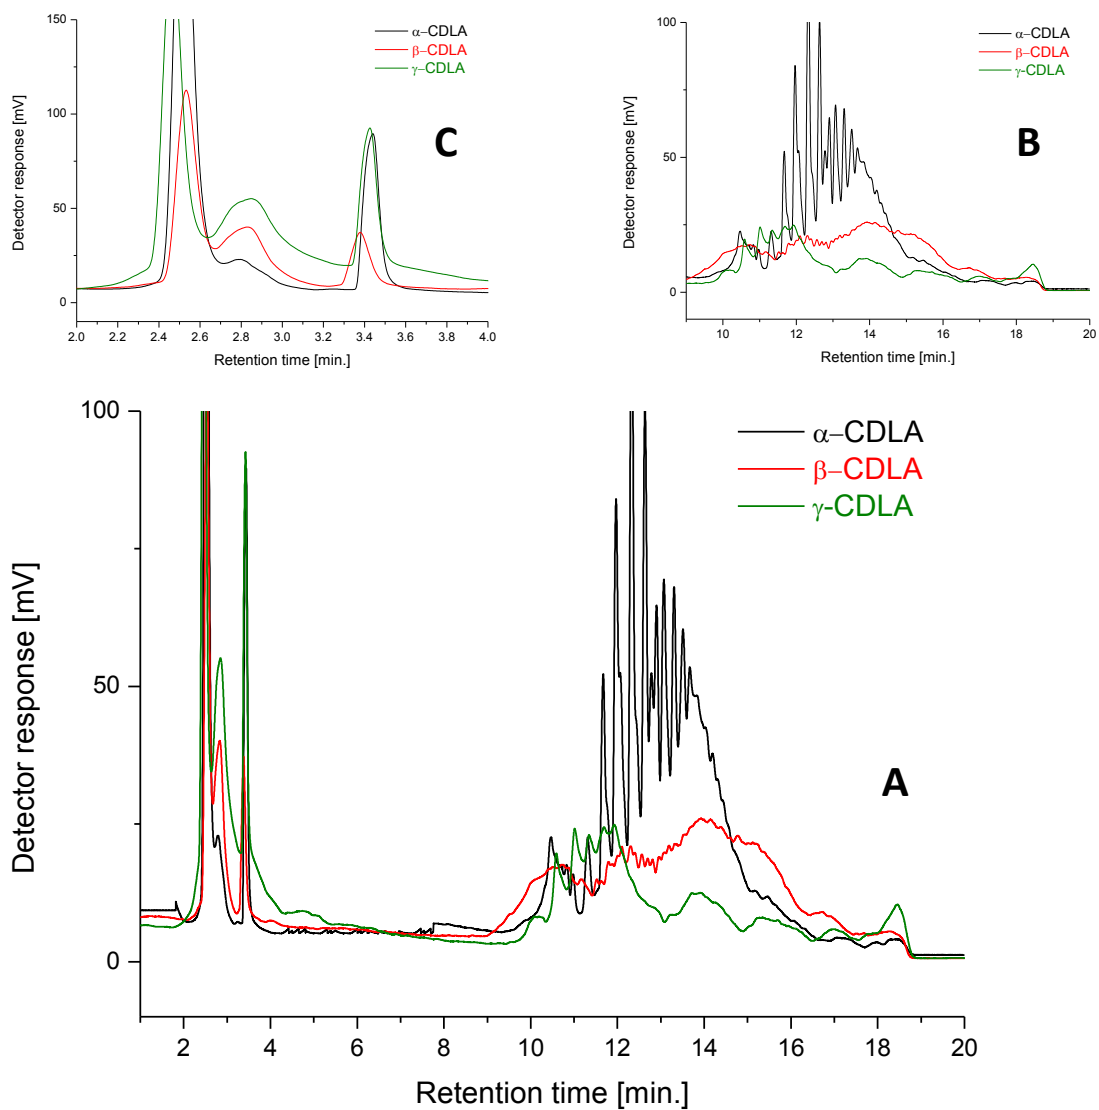

**Figure S1:** LC-ESLD chromatograms of  $\alpha$ -,  $\beta$ - and  $\gamma$ -CD-LA (A), highlights of 9–20 min region (B) and 2–4 min region (C).

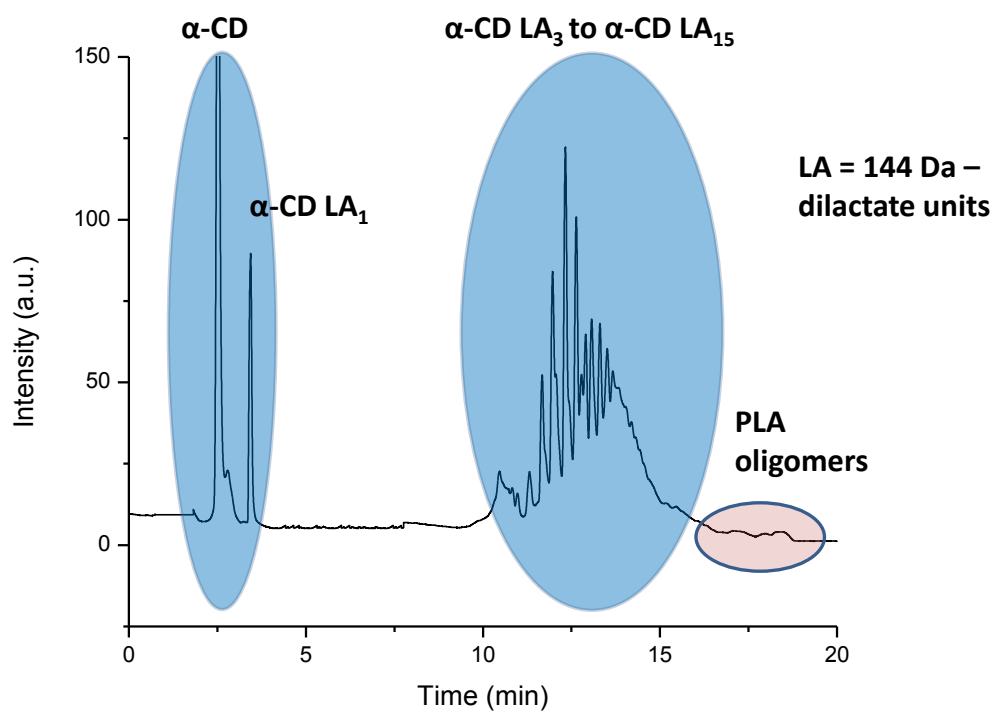

**Figure S2:** LC-ESLD chromatogram of  $\alpha$ -CD-LA (f1 - 2.3 - 3 min; f2 - 3 - 4.2 min; f3 - 9.8 - 12 min; f4 - 12 - 14 min; f5 - 14 - 16 min; f6 - 16 - 19 min).

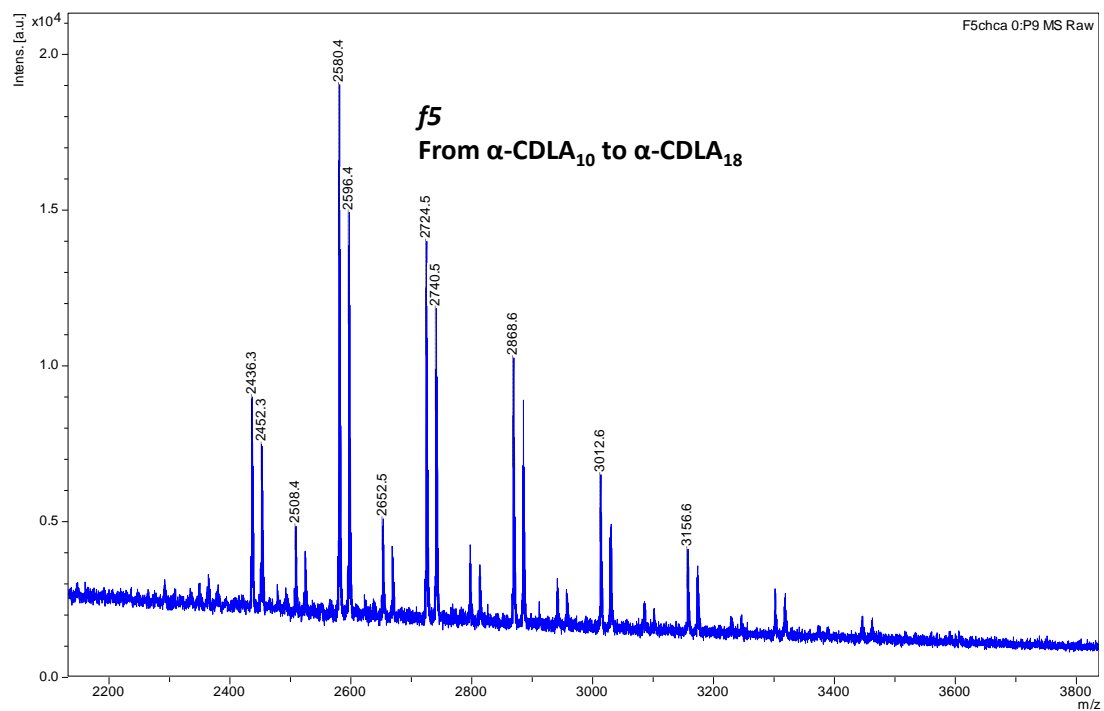

**Figure S3:** MALDI-MS spectrum of fraction f5 from  $\alpha$ -CD-LA separation.

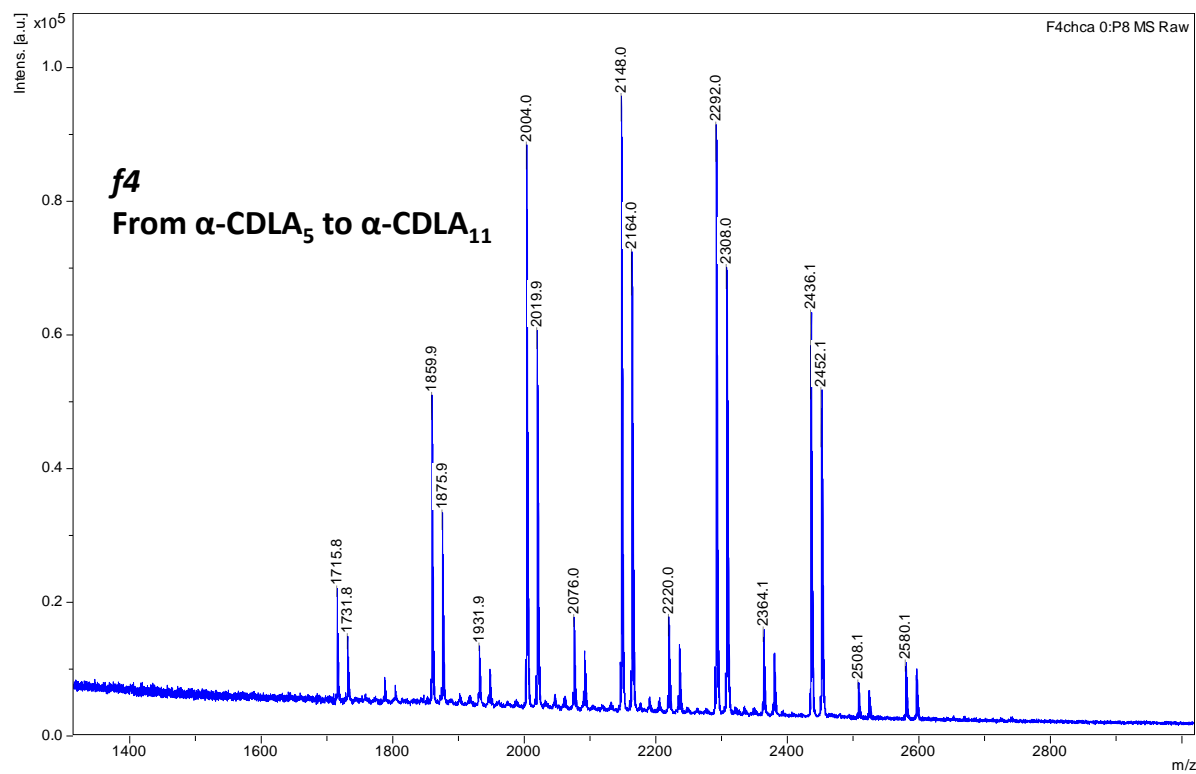

**Figure S4:** MALDI-MS spectrum of fraction f4 from  $\alpha$ -CD-LA separation.

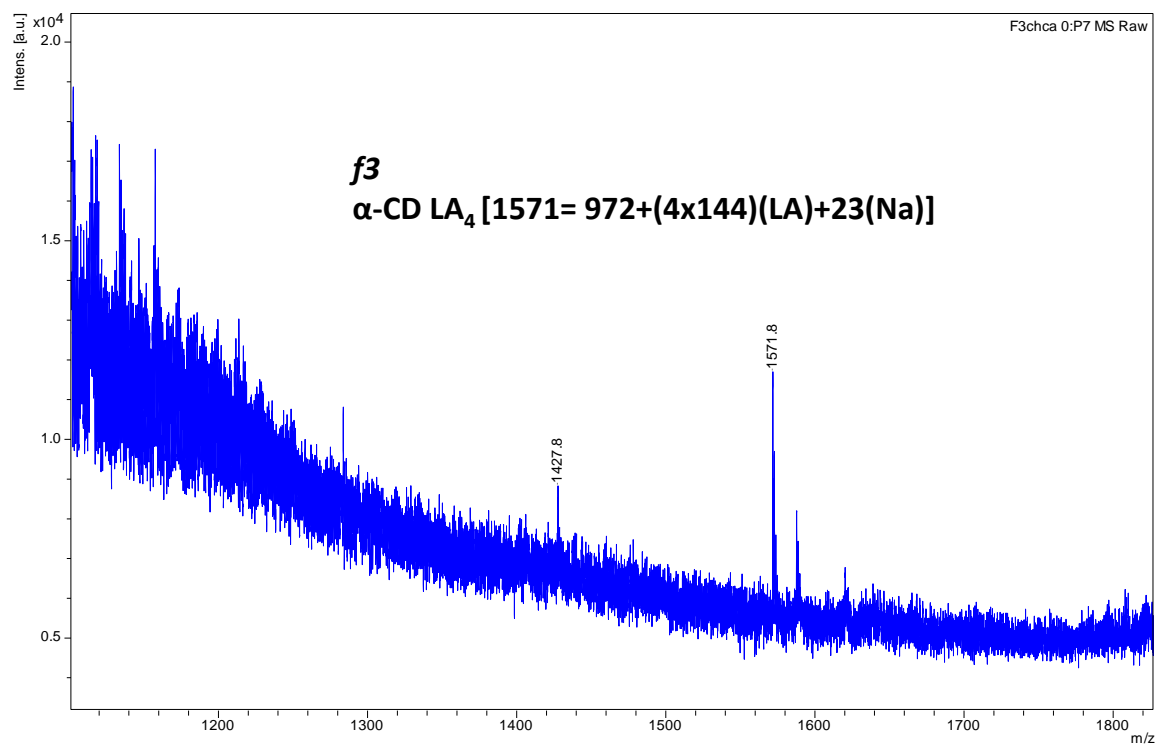

**Figure S5:** MALDI-MS spectrum of fraction f3 from  $\alpha$ -CD-LA separation.

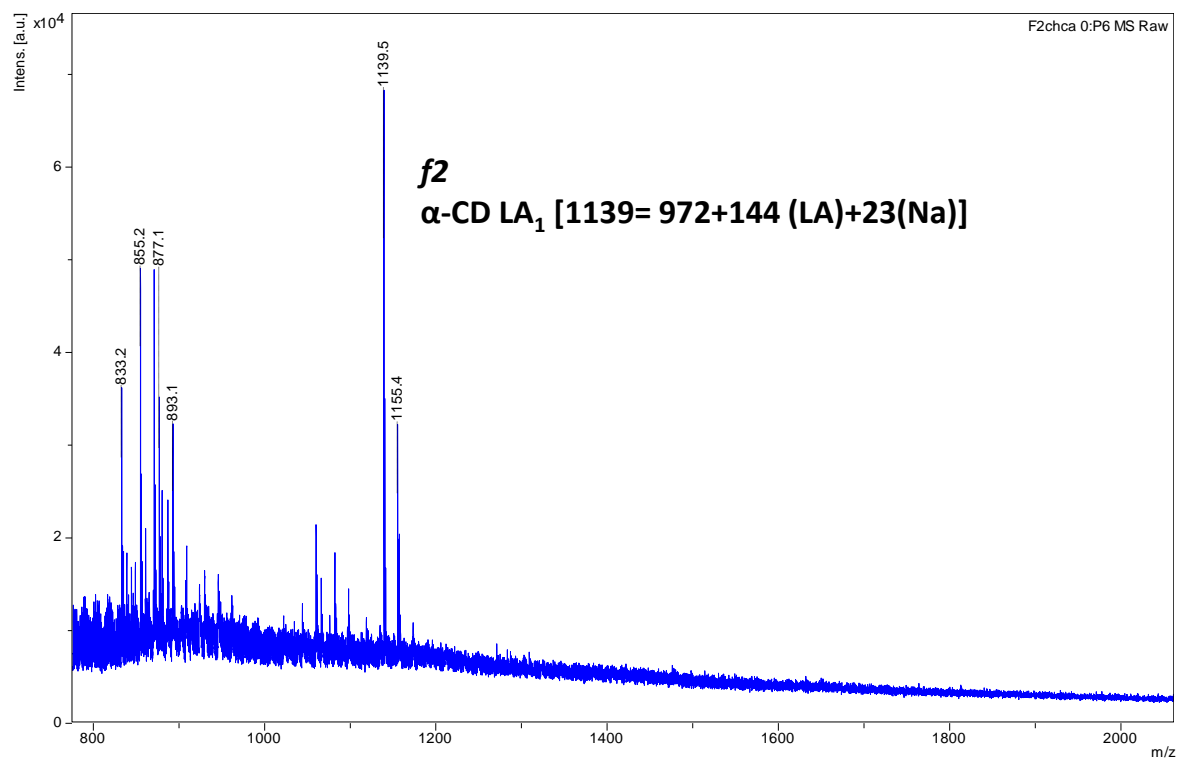

**Figure S6:** MALDI-MS spectrum of fraction f2 from  $\alpha$ -CD-LA separation.

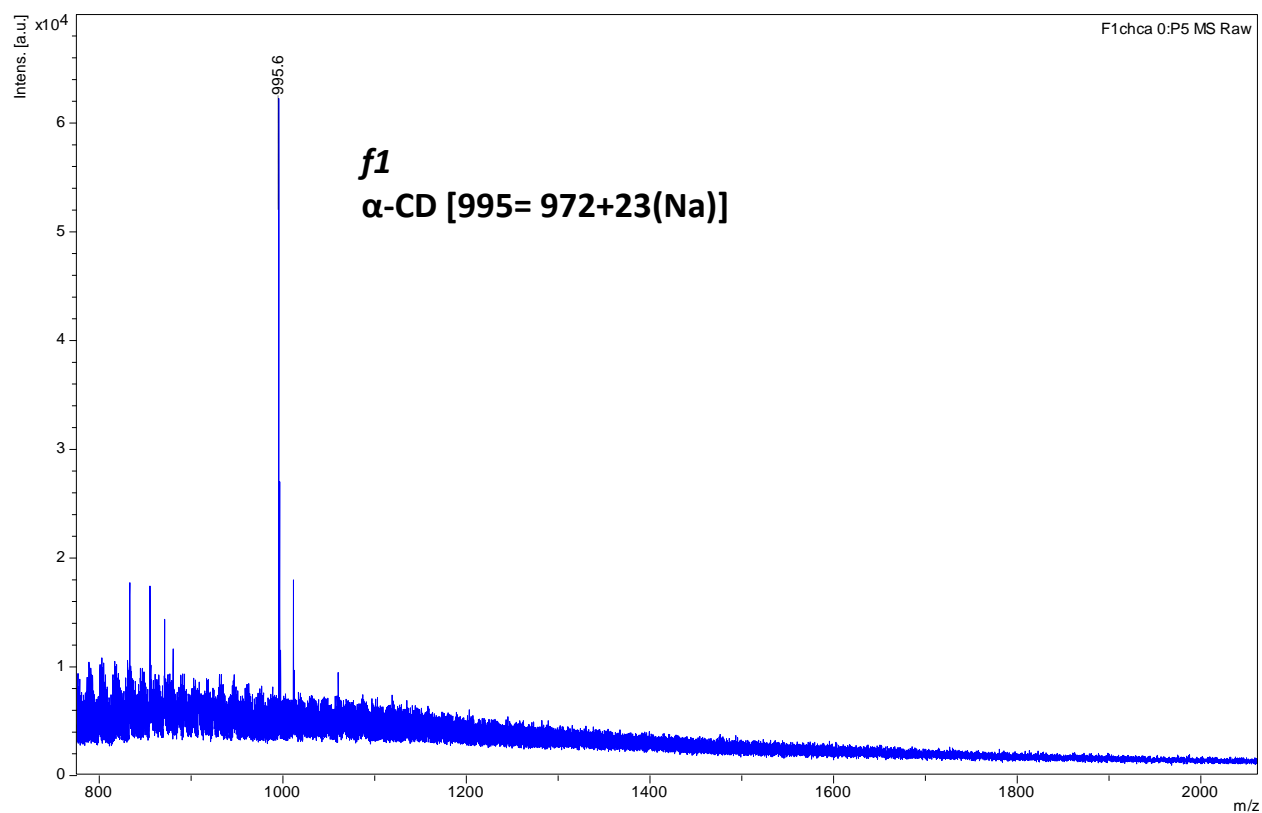

**Figure S7:** MALDI-MS spectrum of fraction f1 from  $\alpha$ -CD-LA separation.

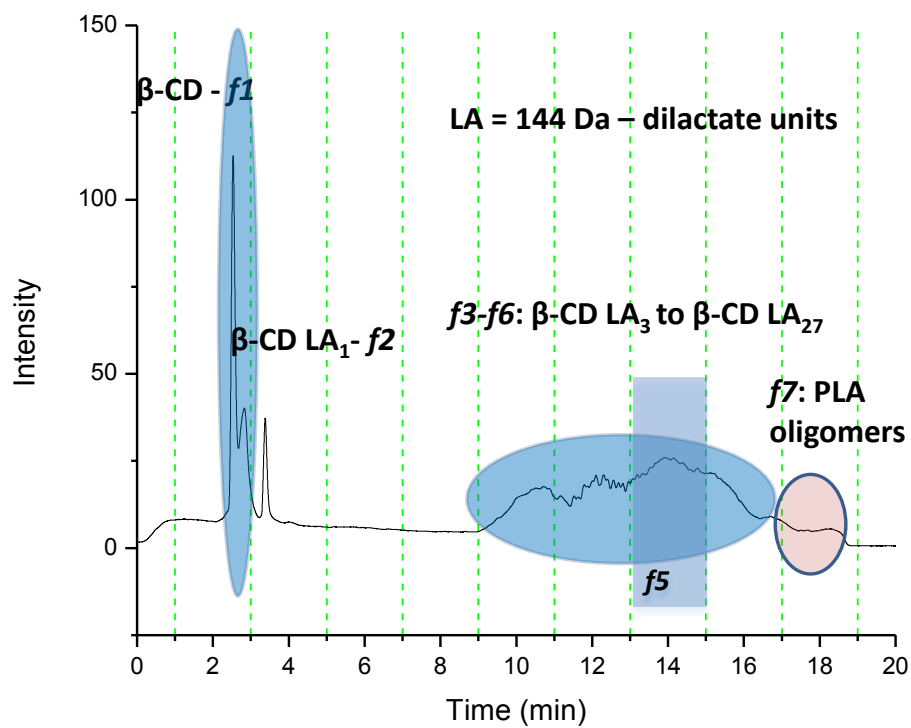

**Figure S8:** LC-ESLD chromatogram of  $\beta$ -CD-LA (*f1* - 2– 3 min; *f2* - 3 – 4 min; *f3* - 9 – 11 min; *f4* - 11 – 13 min; *f5* - 13 – 15 min; *f6* - 15 – 17 min; *f7* - 17 – 19 min).

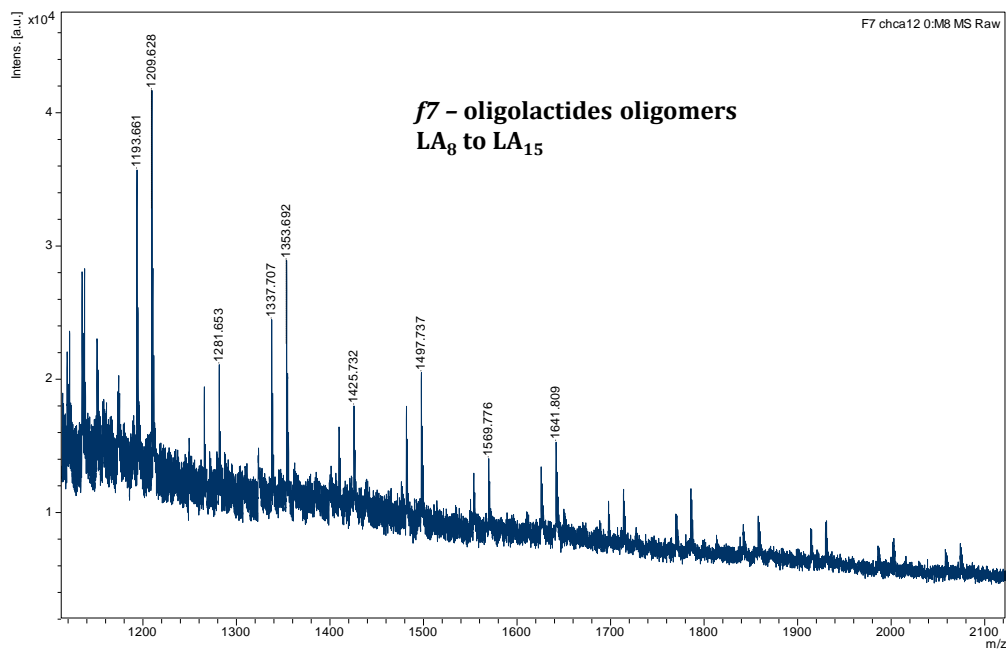

**Figure S9:** MALDI-MS spectrum of fraction *f7* from  $\beta$ -CD-LA separation.

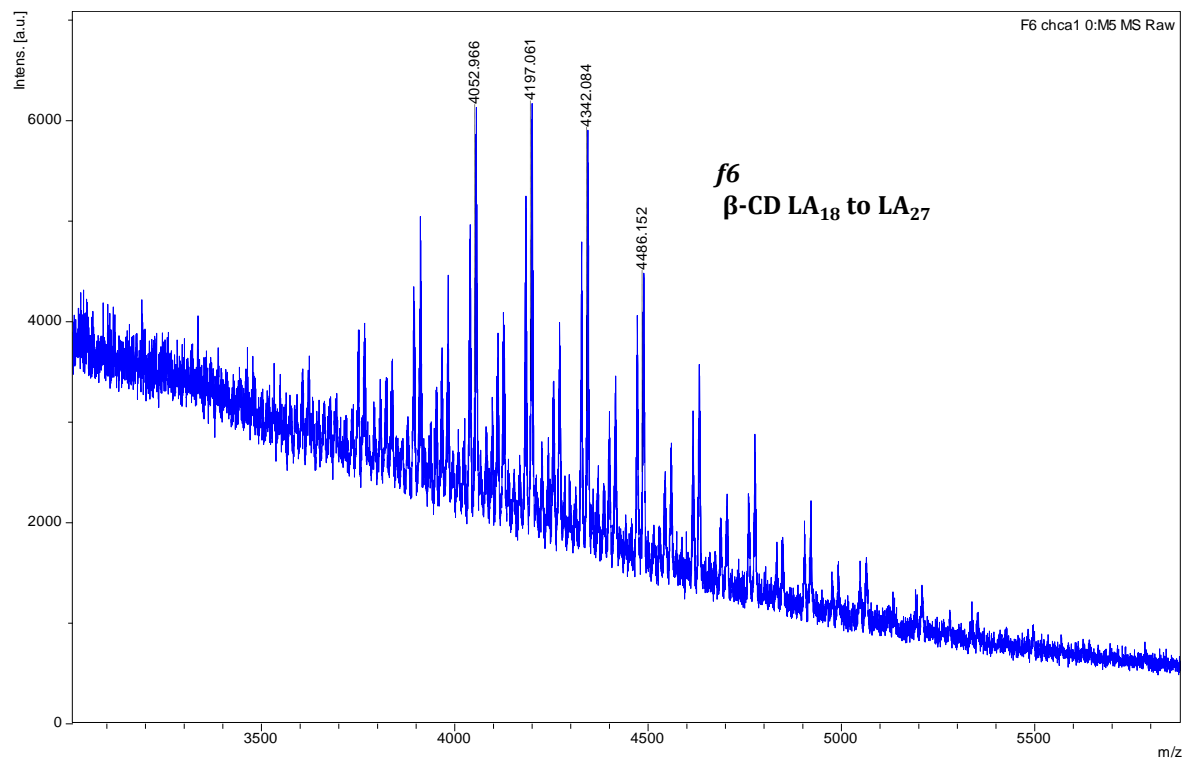

**Figure S10:** MALDI-MS spectrum of fraction *f6* from  $\beta$ -CD-LA separation.

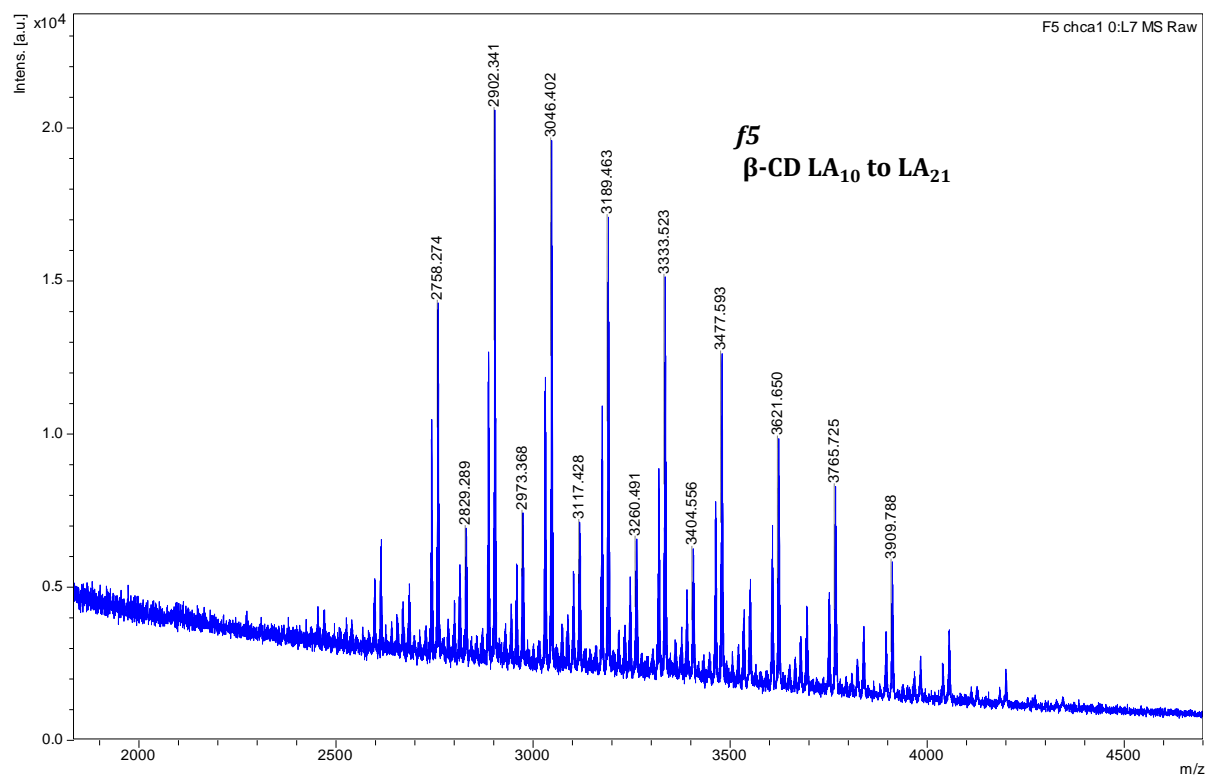

**Figure S11:** MALDI-MS spectrum of fraction *f5* from  $\beta$ -CD-LA separation.

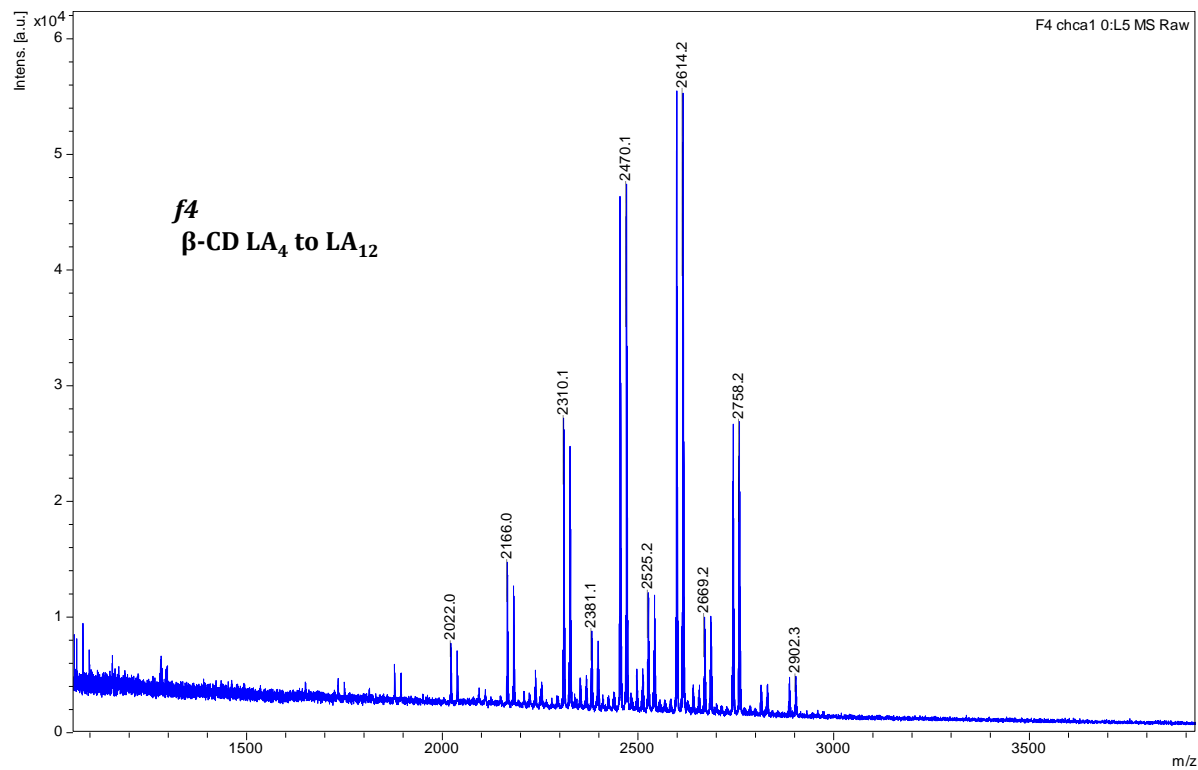

**Figure S12:** MALDI-MS spectrum of fraction  $f_4$  from  $\beta$ -CD-LA separation.

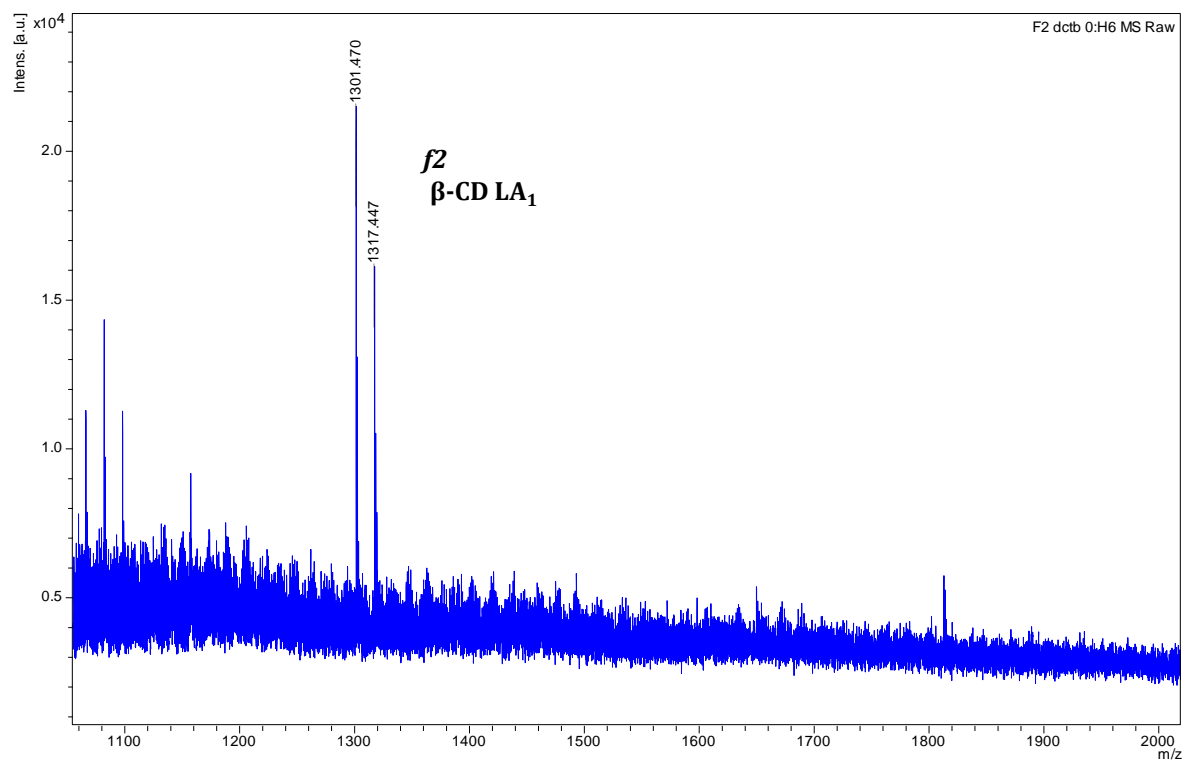

**Figure S13:** MALDI-MS spectrum of fraction  $f_2$  from  $\beta$ -CD-LA separation.



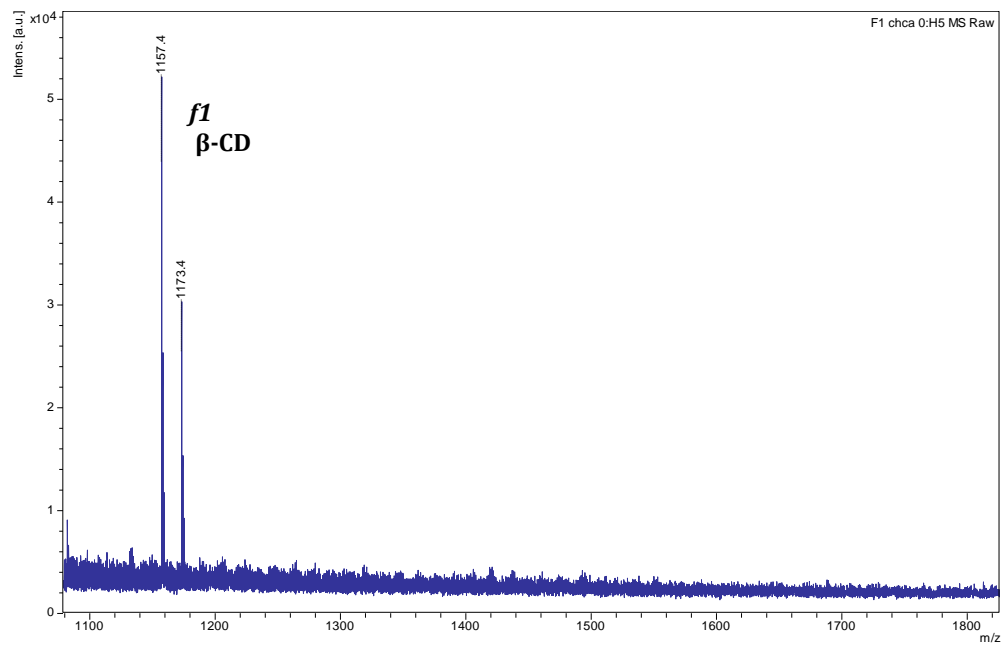

**Figure S14:** MALDI-MS spectrum of fraction *f1* from  $\beta$ -CD-LA separation.

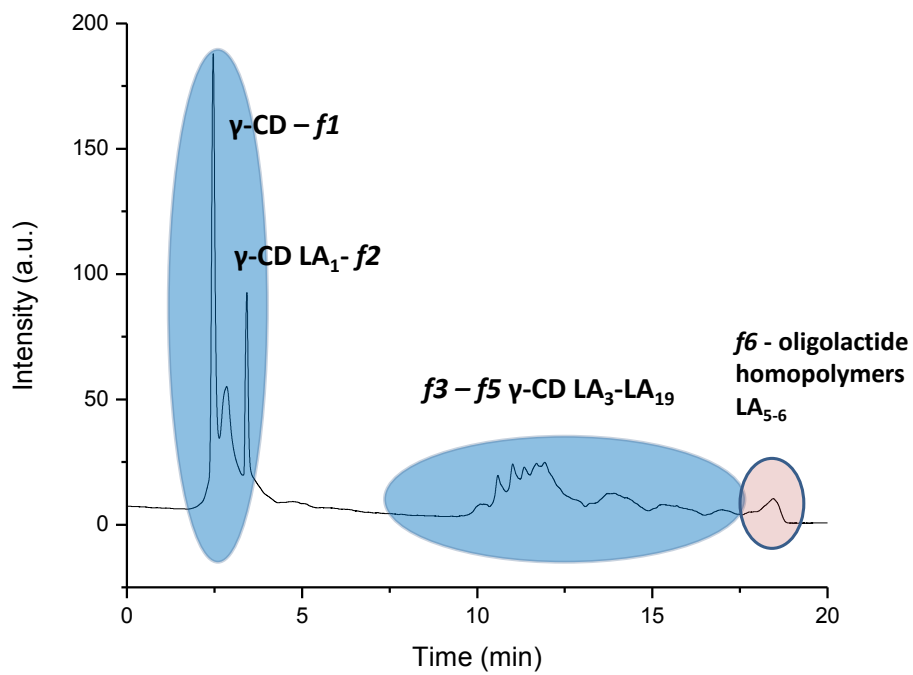

**Figure S15:** LC-ESLD chromatogram of  $\gamma$ -CD-LA (*f1* - 2.3 – 3 min; *f2* – 3 – 4.2 min; *f3* – 10 – 12.5 min; *f4* – 12.5 – 15 min; *f5* – 15 – 17.5 min; *f6* – 17.5 – 19 min).

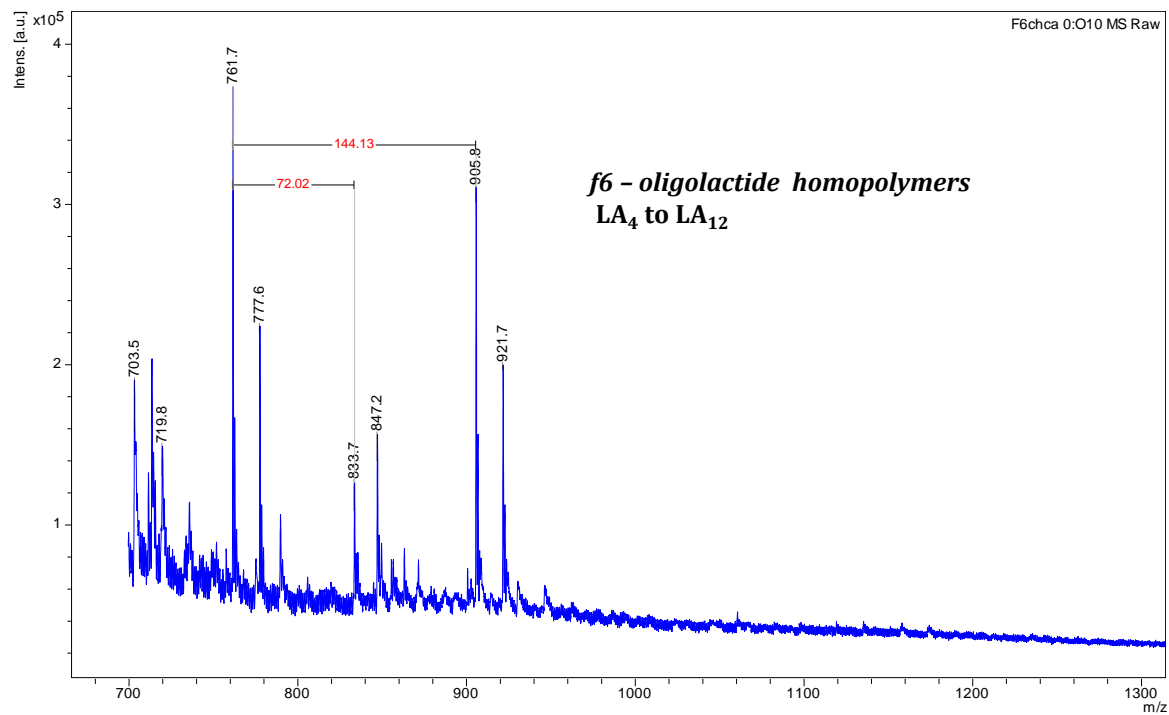

**Figure S16:** MALDI-MS spectrum of fraction *f6* from  $\gamma$ -CD-LA separation.

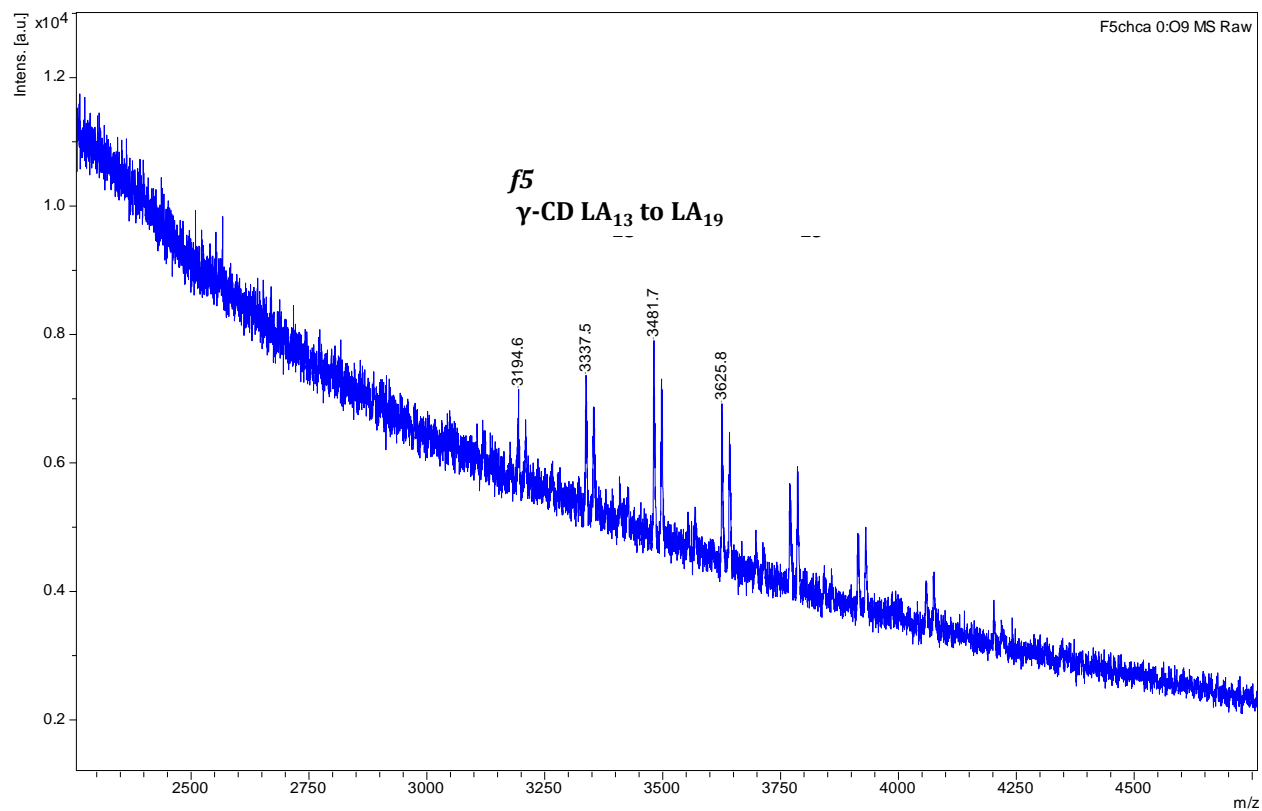

**Figure S17:** MALDI-MS spectrum of fraction *f5* from  $\gamma$ -CD-LA separation.

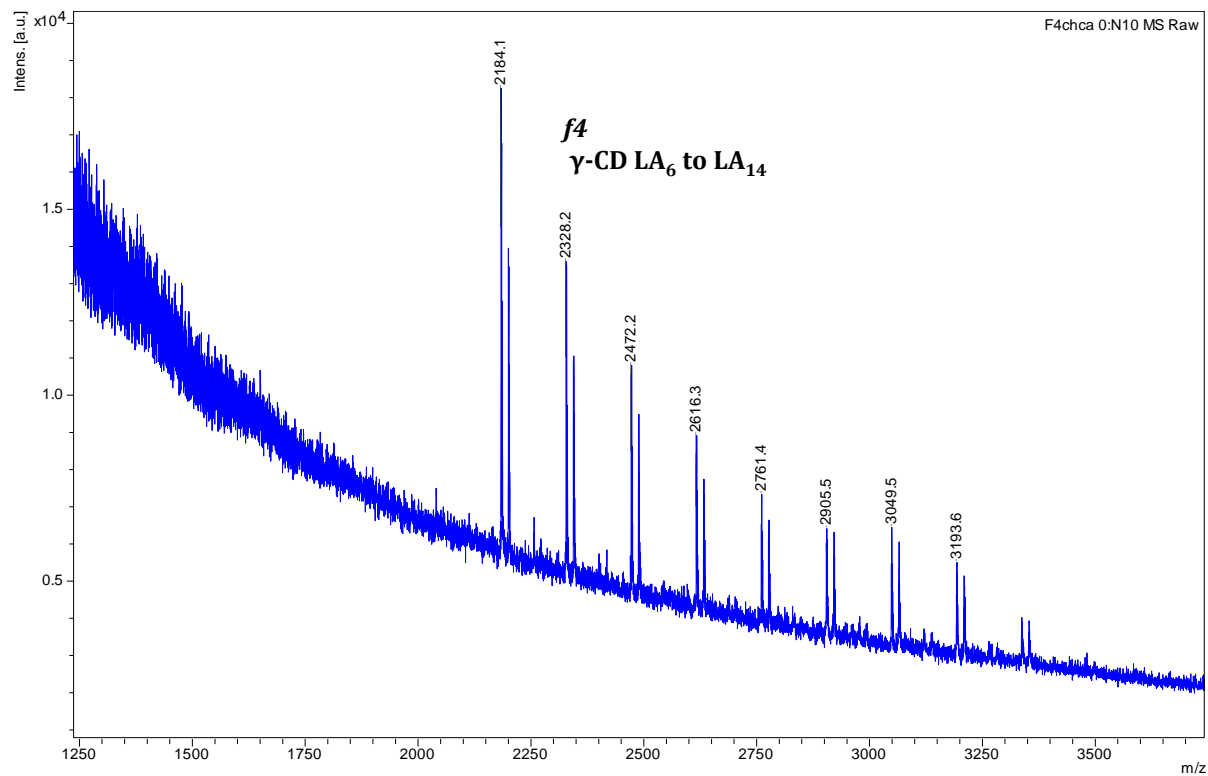

**Figure S18:** MALDI-MS spectrum of fraction *f4* from  $\gamma$ -CD-LA separation.

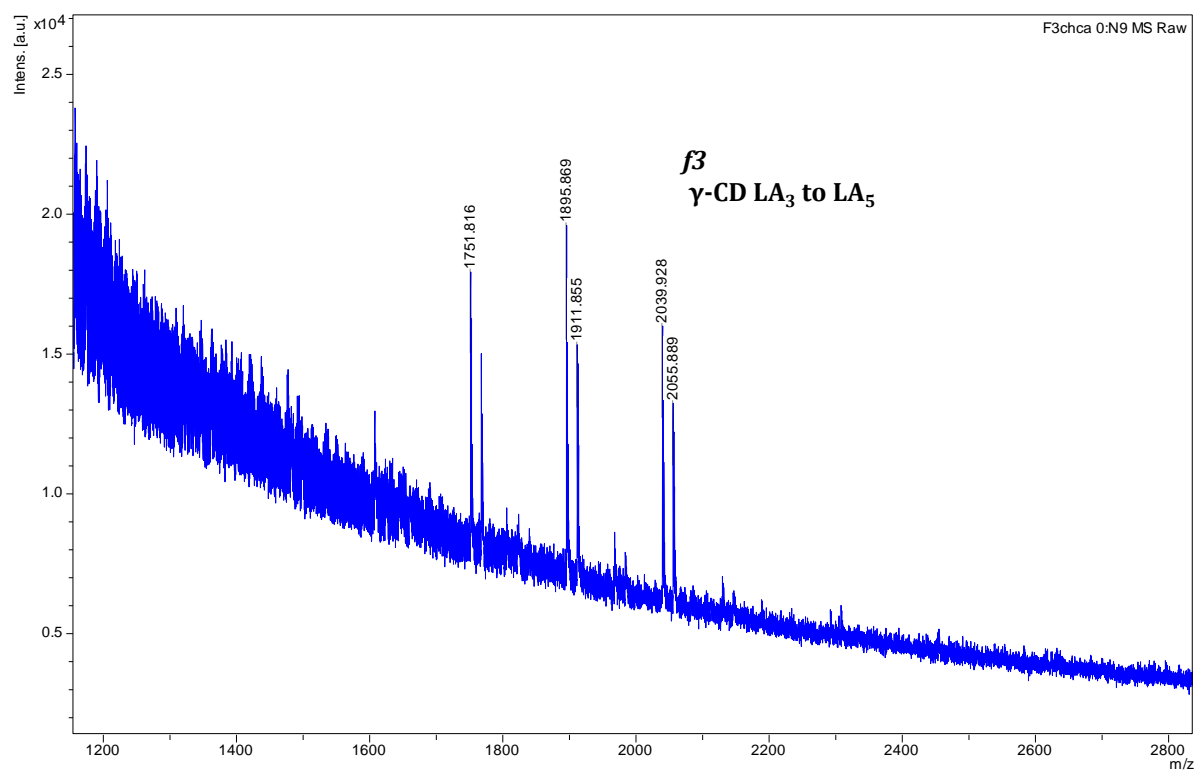

**Figure S19:** MALDI-MS spectrum of fraction *f3* from  $\gamma$ -CD-LA separation.

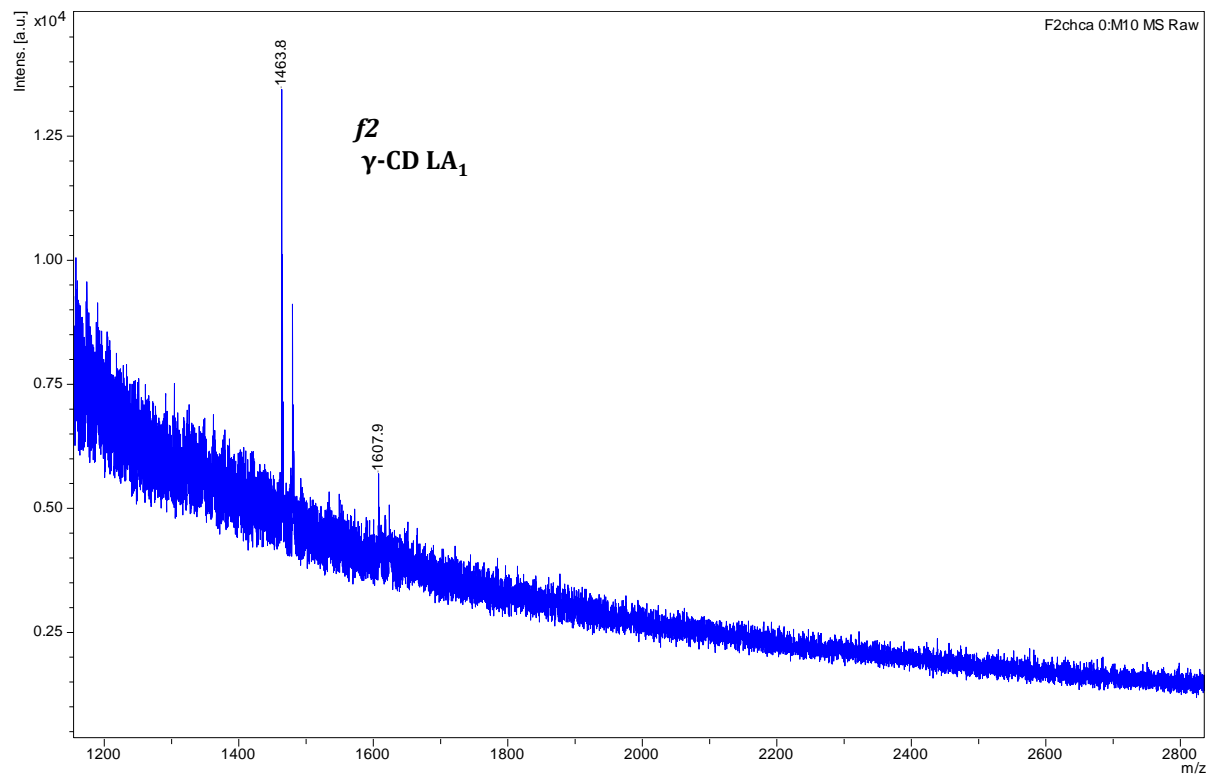

**Figure S20:** MALDI-MS spectrum of fraction *f2* from  $\gamma$ -CD-LA separation.

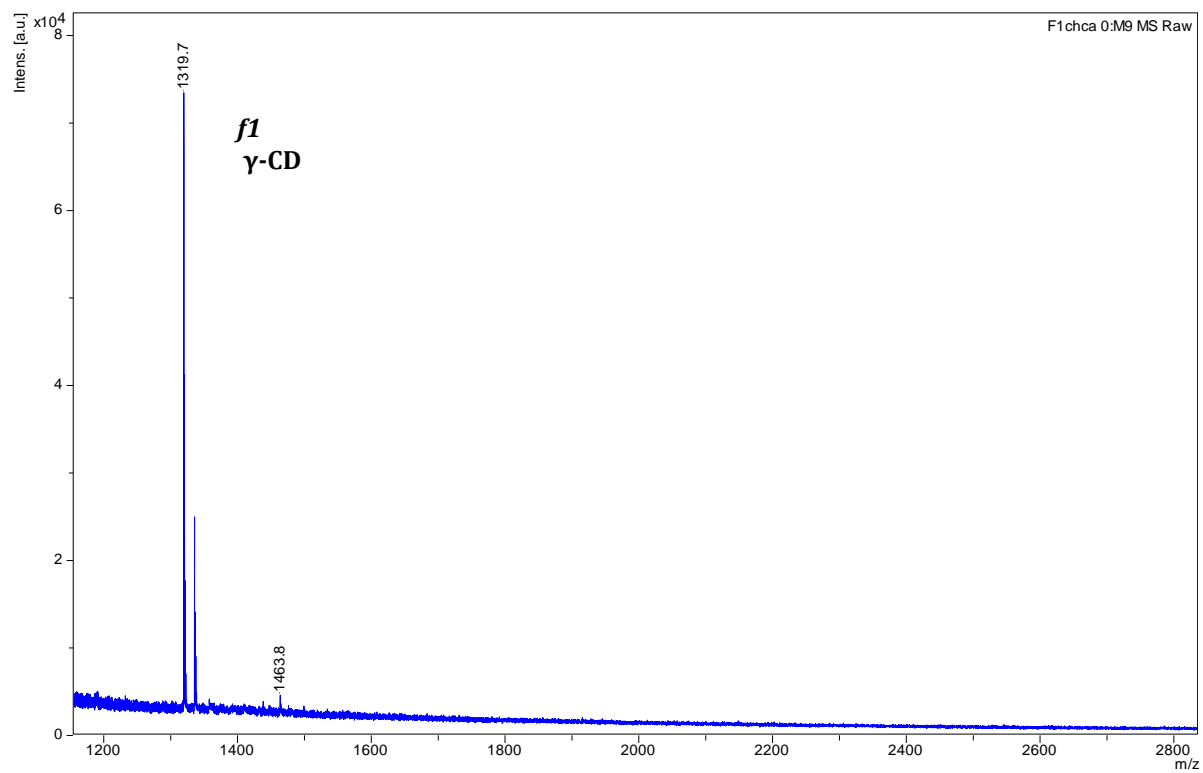

**Figure S21:** MALDI-MS spectrum of fraction *f1* from  $\gamma$ -CD-LA separation.

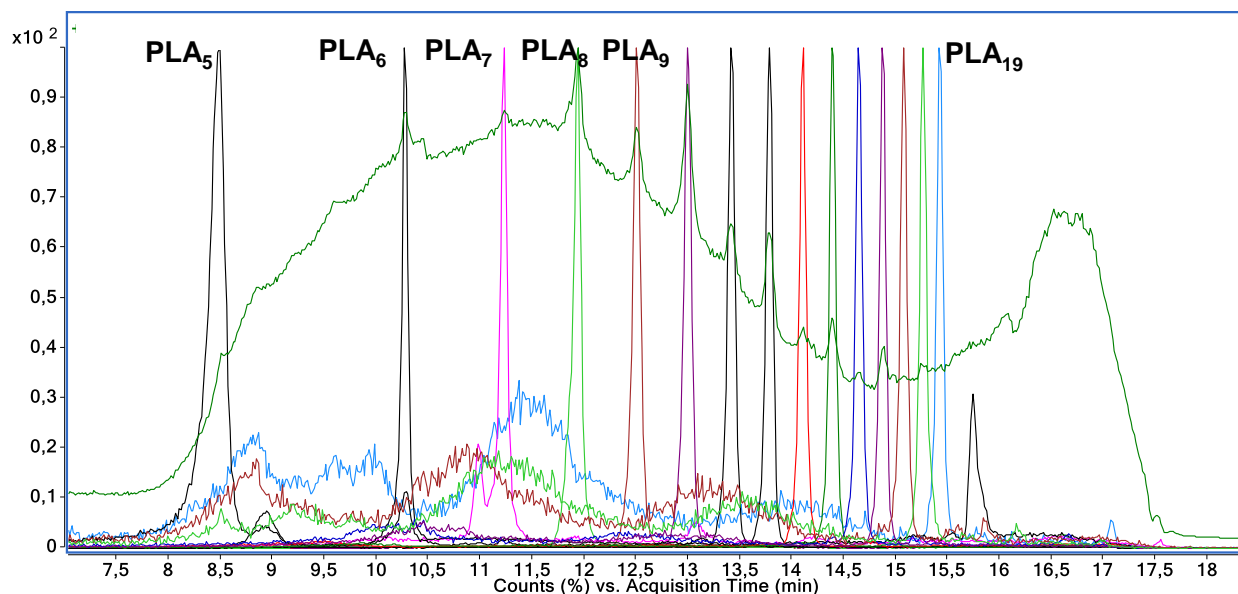

**Figure S22:** LC-MS separation of  $\beta$ -CD-LA (total ion chromatogram from 8 to 17.5 min and extracted ion chromatograms of PLA oligomers from 5 to 19 lactate units).

*In Figure S22 are overlapped the extracted ion chromatograms for PLA homopolymers; each extracted ion chromatogram is scaled to the highest peak, giving only qualitative information when compared with all other chromatograms.*

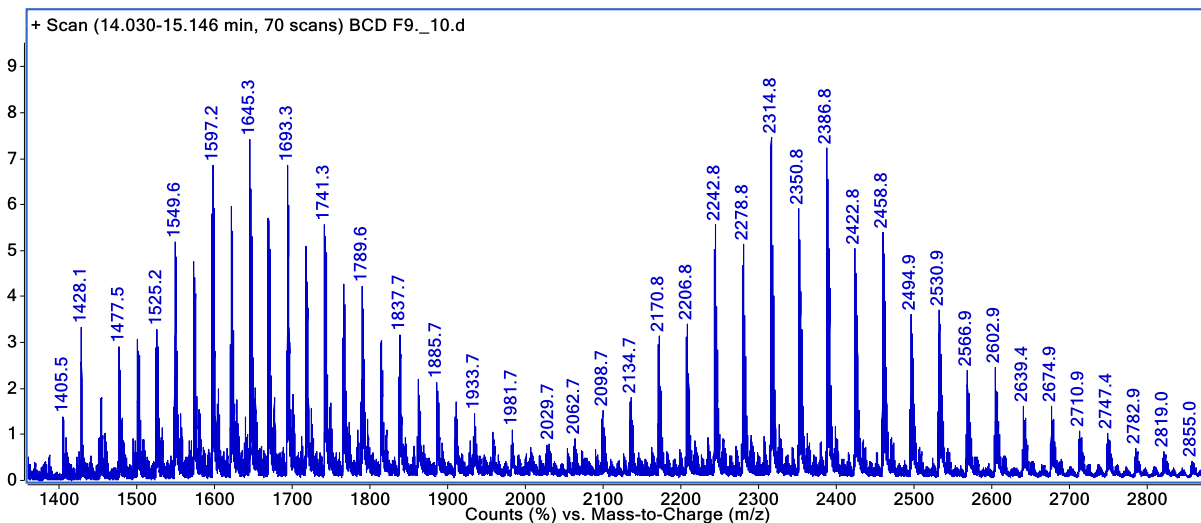

**Figure S23:** LC-ESI-MS spectrum  $\beta$ -CD-LA collected between 14 and 15 min; contains double charged (left) and triple charged (right) species of  $\beta$ -CD-LA (average mass of this fraction is close to 5000 Da).

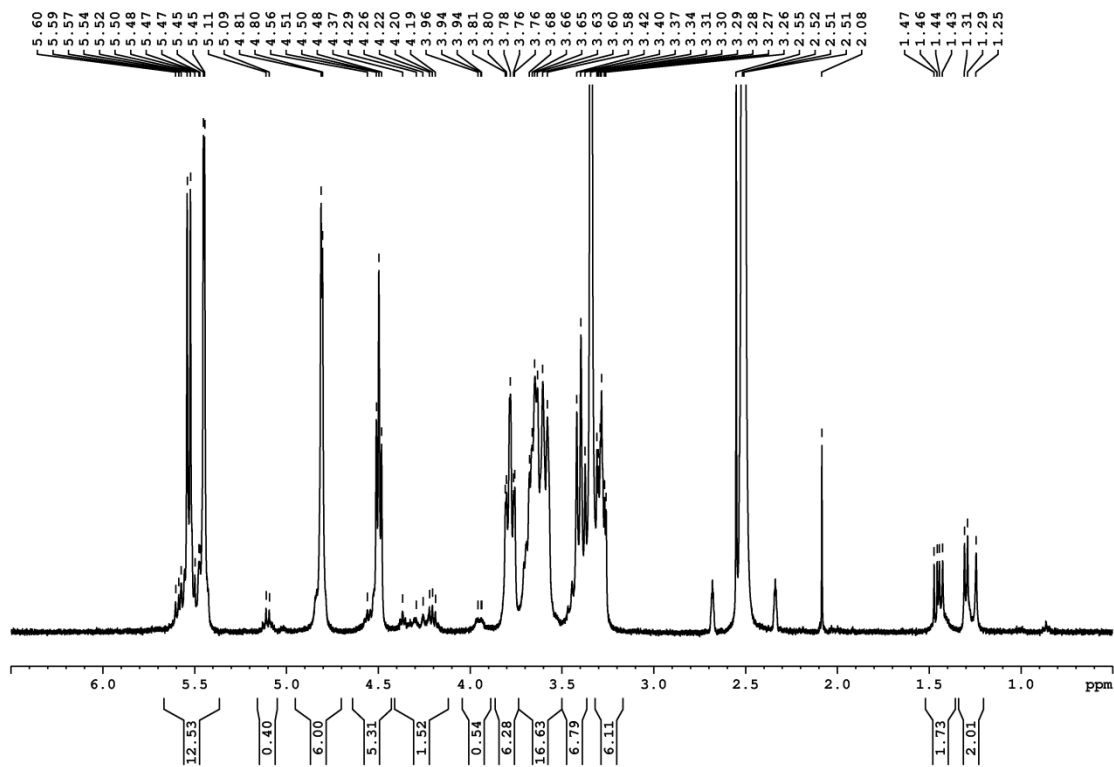

**Figure S24:** <sup>1</sup>H NMR spectrum of α-CD-LA F1 fraction.

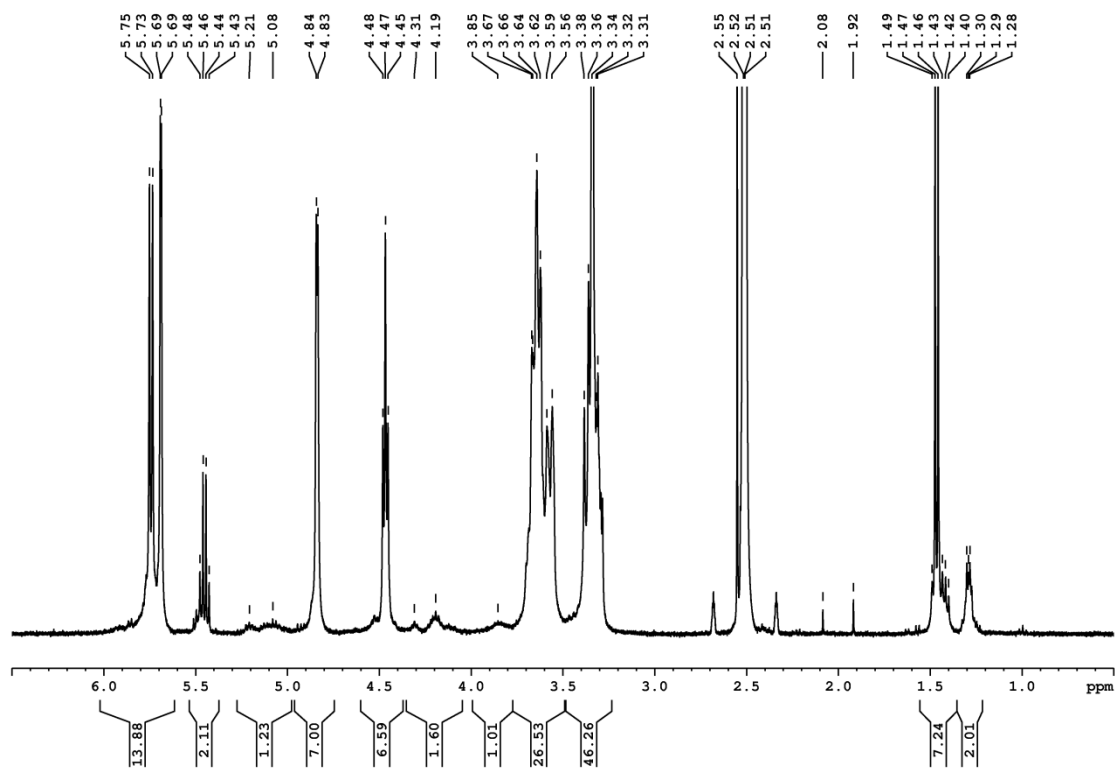

**Figure S25:** <sup>1</sup>H NMR spectrum of β-CD-LA F1 fraction.

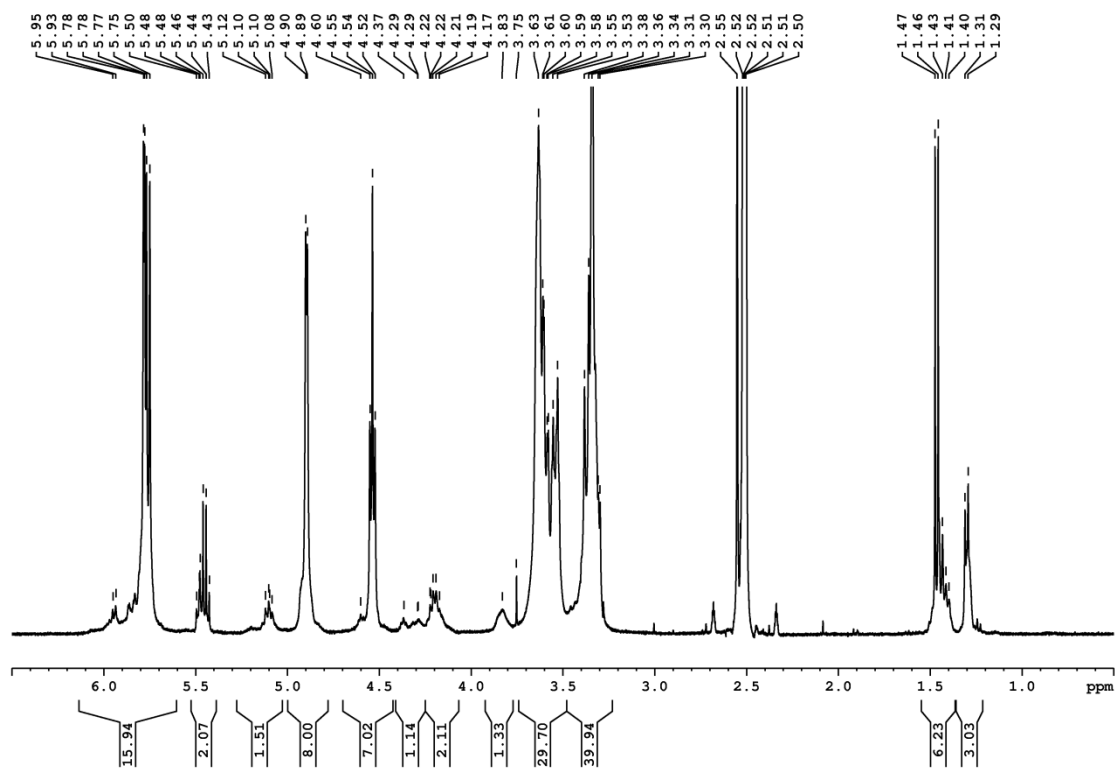

**Figure S26:** <sup>1</sup>H NMR spectrum of γ-CD-LA F1 fraction.



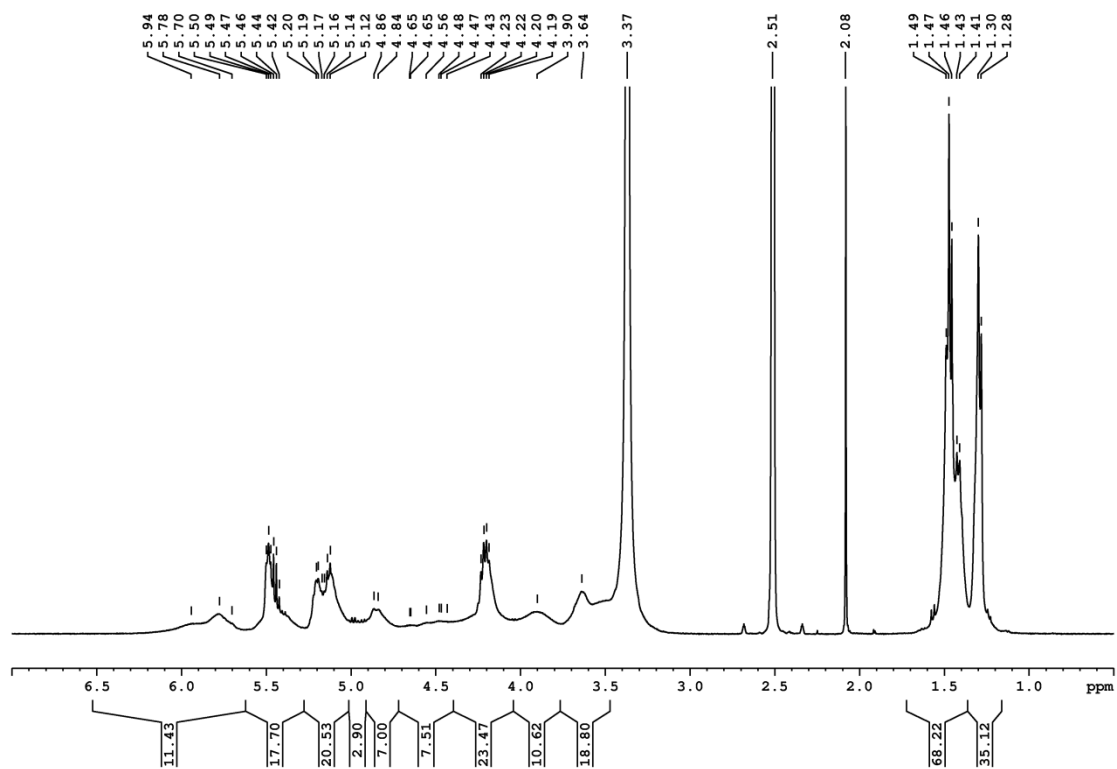

**Figure S27:**  $^1\text{H}$  NMR spectrum of  $\beta$ -CD-LA F2 fraction.

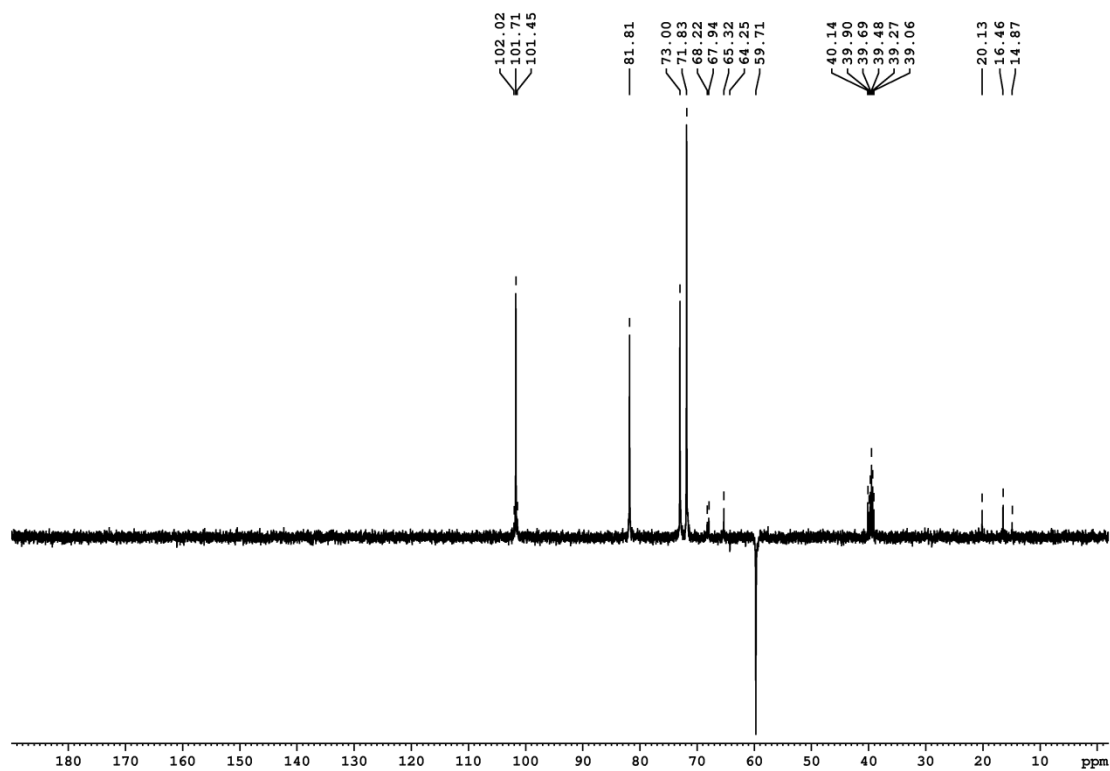

**Figure S28:** DEPT135-NMR spectrum of  $\alpha$ -CD-LA F1 fraction.

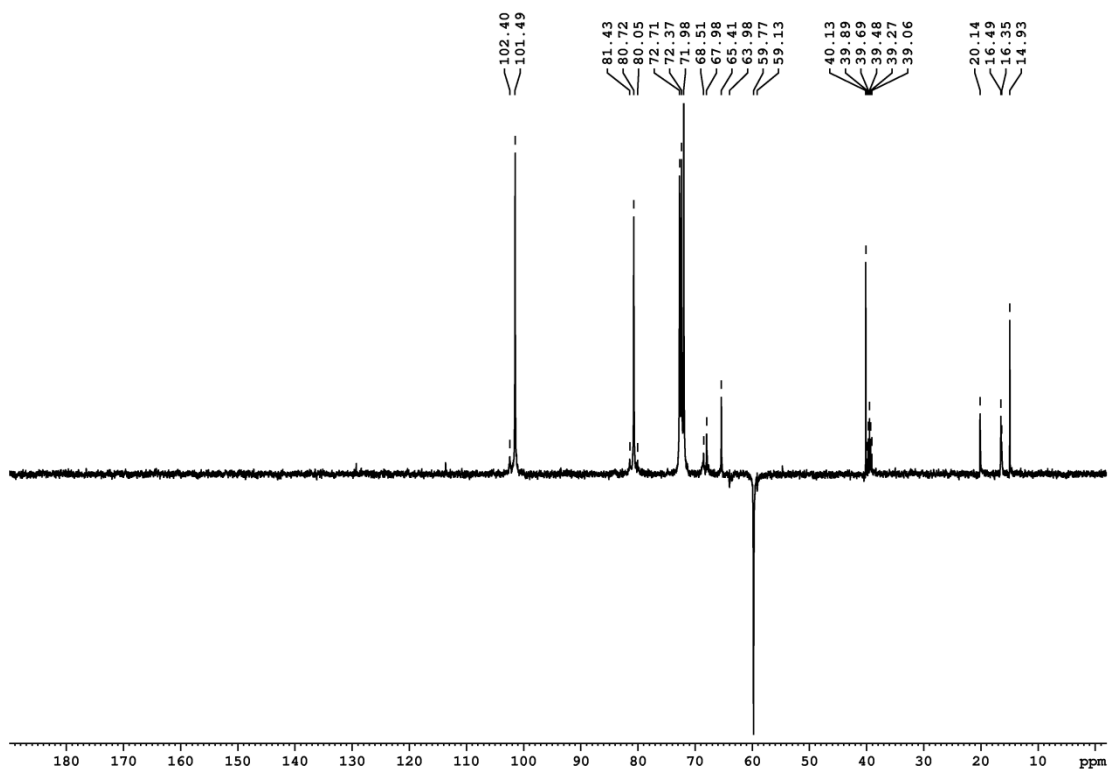

**Figure S29:** DEPT135-NMR spectrum of  $\gamma$ -CD-LA F1 fraction.

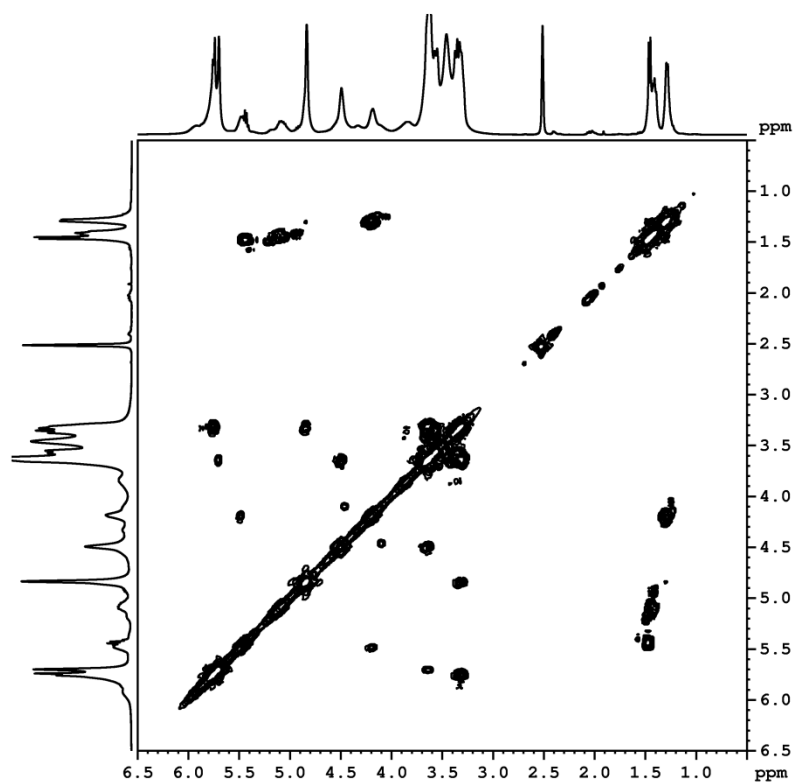

**Figure S30:** 2D-COSY-NMR spectrum of  $\beta$ -CD-LA F1 fraction.

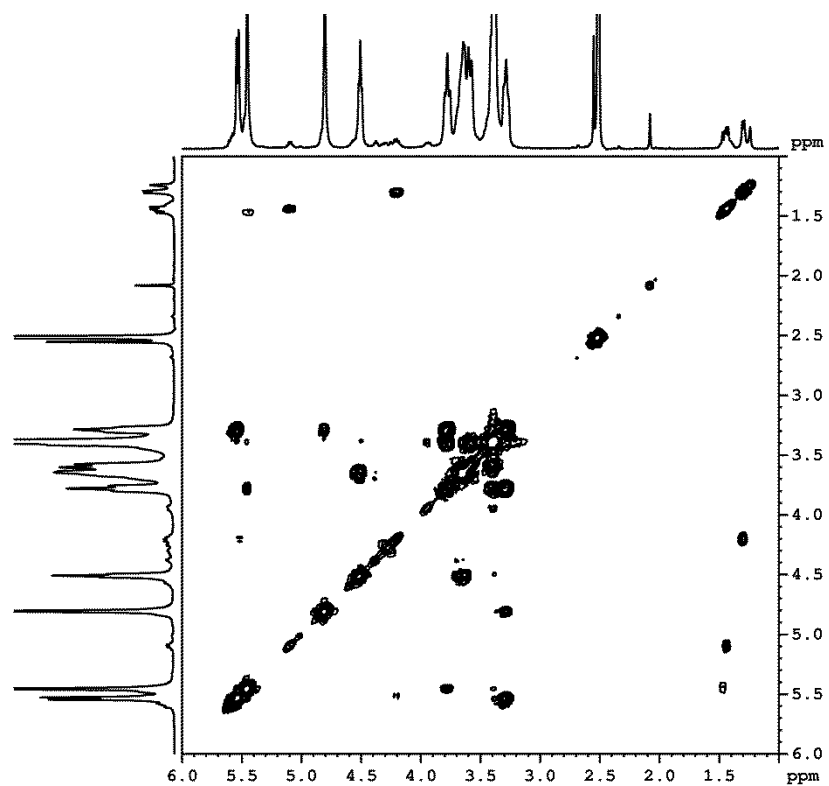

**Figure S31:** 2D-COSY-NMR spectrum of  $\alpha$ -CD-LA F1 fraction.

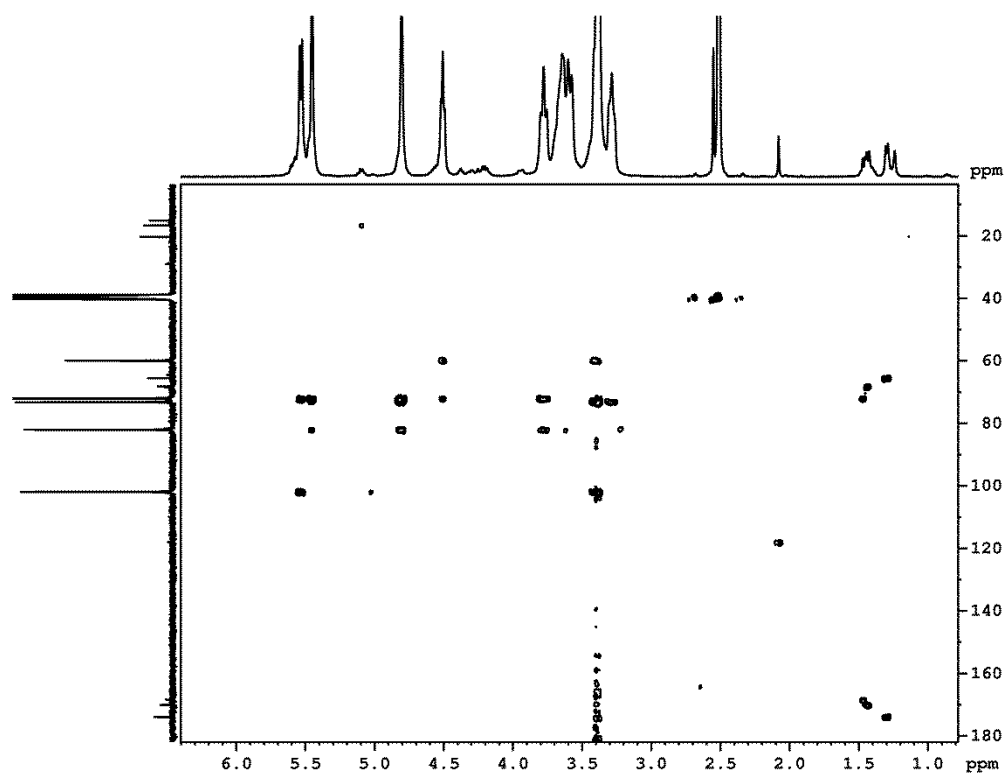

**Figure S32:** 2D-HMBC-NMR spectrum of  $\alpha$ -CD-LA F1 fraction.

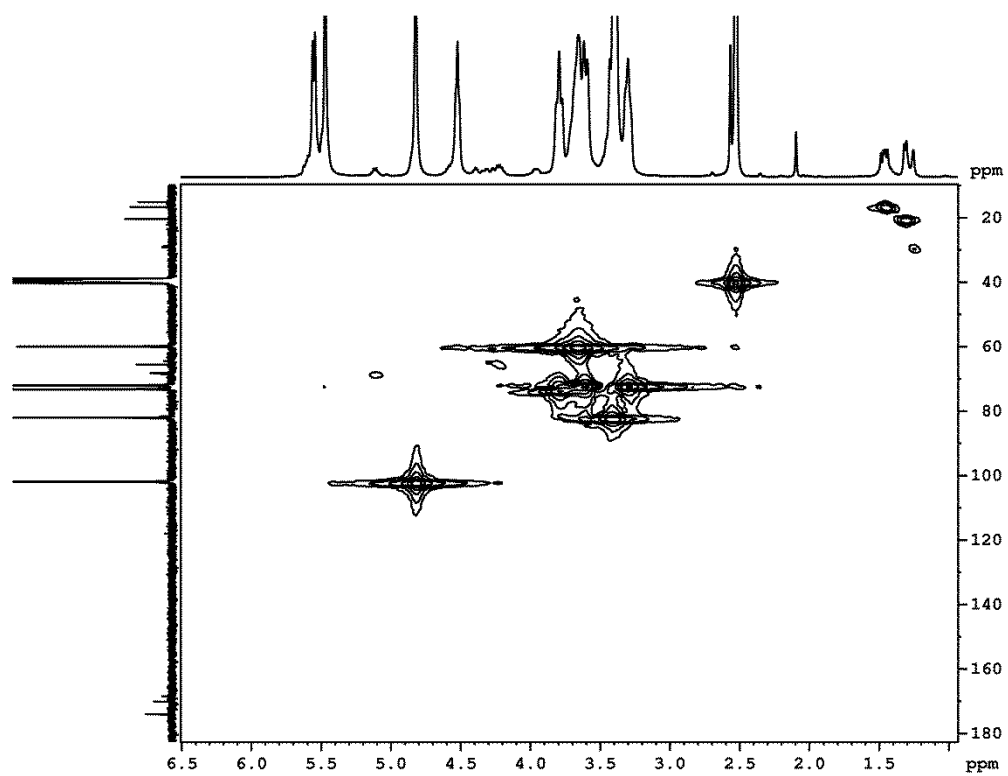

**Figure S33:** 2D-HMQC-NMR spectrum of  $\alpha$ -CD-LA F1 fraction.

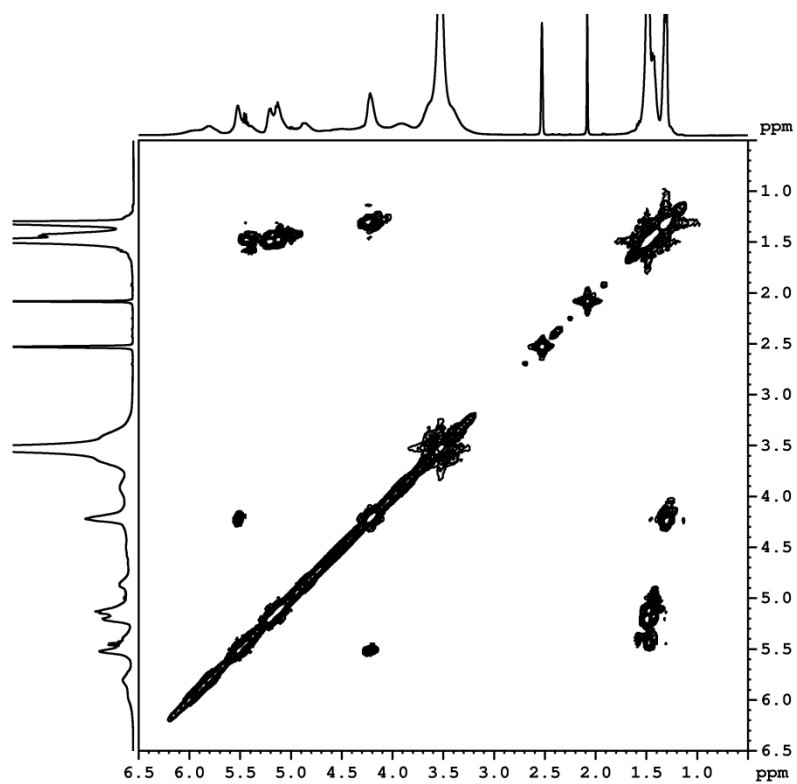

**Figure S34:** 2D-COSY-NMR spectrum of  $\beta$ -CD-LA F2 fraction.



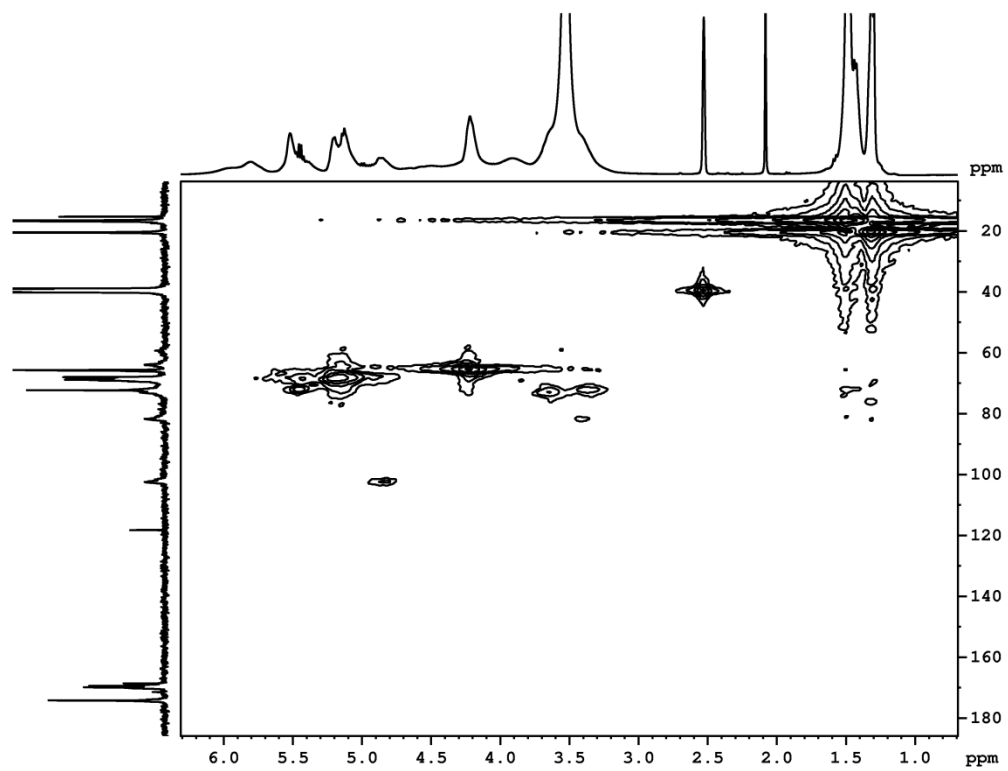

**Figure S35:** 2D-HMQC-NMR spectrum of  $\beta$ -CD-LA F2 fraction.

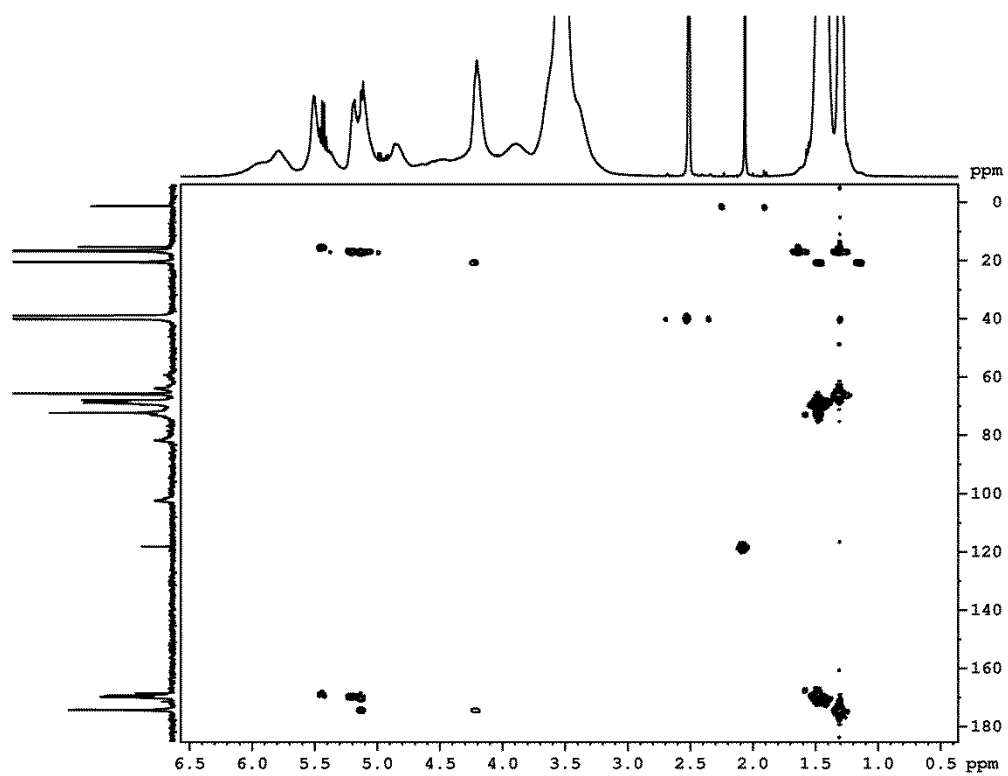

**Figure S36:** 2D-HMBC-NMR spectrum of  $\beta$ -CD-LA F2 fraction.

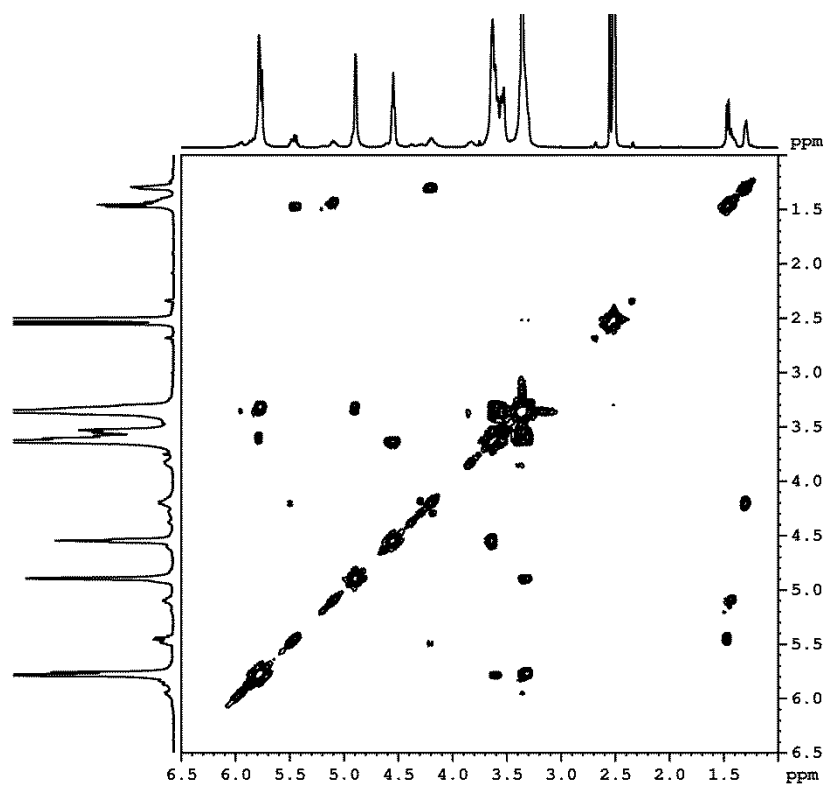

**Figure S37:** 2D-COSY-NMR spectrum of  $\gamma$ -CD-LA F1 fraction.

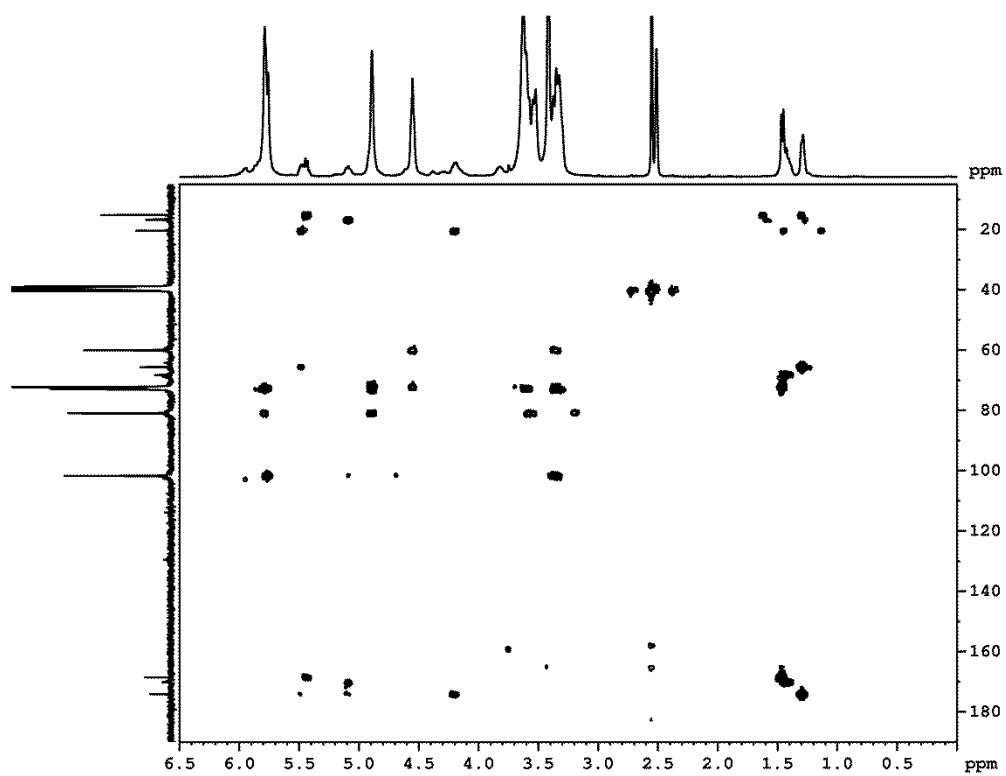

**Figure S38:** 2D-HMBC-NMR spectrum of  $\gamma$ -CD-LA F1 fraction.

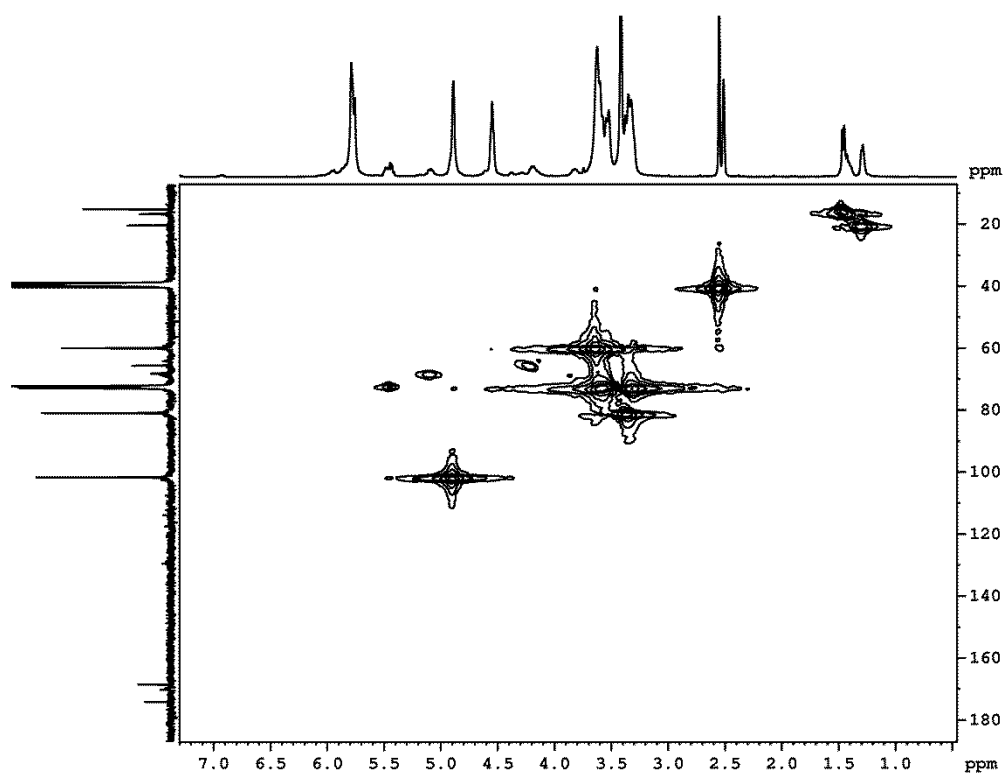

**Figure S39:** 2D-HMOC-NMR spectrum of  $\gamma$ -CD-LA F1 fraction.

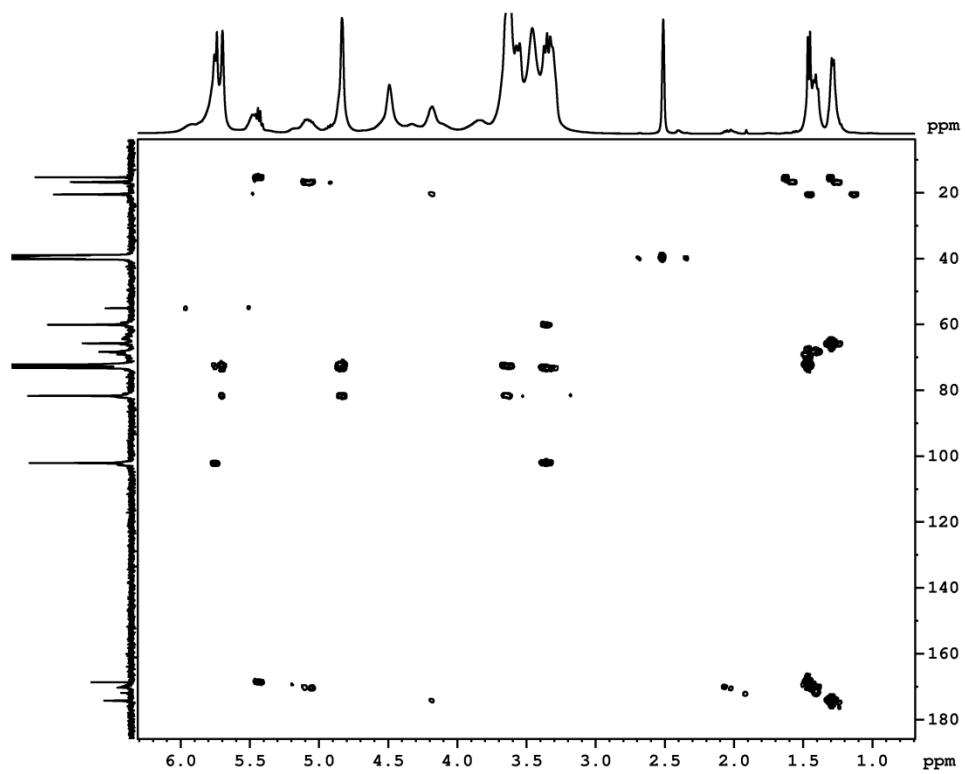

**Figure S40:** 2D-HMBC-NMR spectrum of  $\gamma$ -CD-LA F1 fraction.

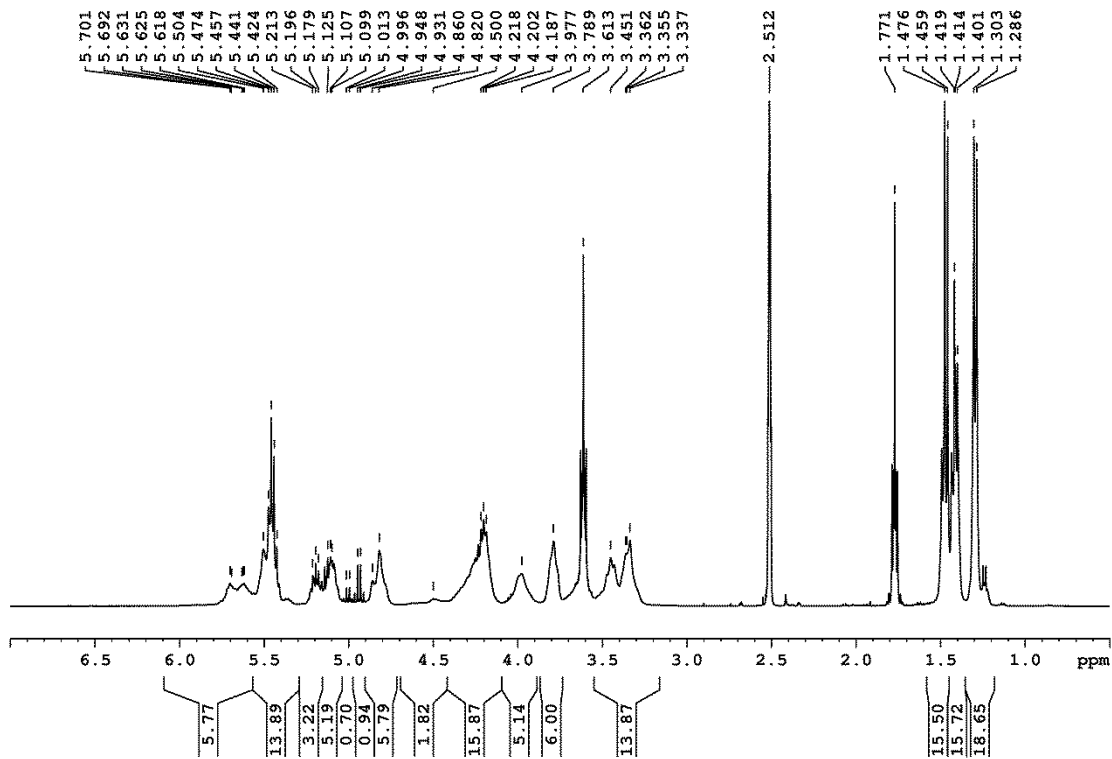

**Figure S41:**  $^1\text{H}$  NMR spectrum of  $\alpha$ -CD-LA F2 fraction.

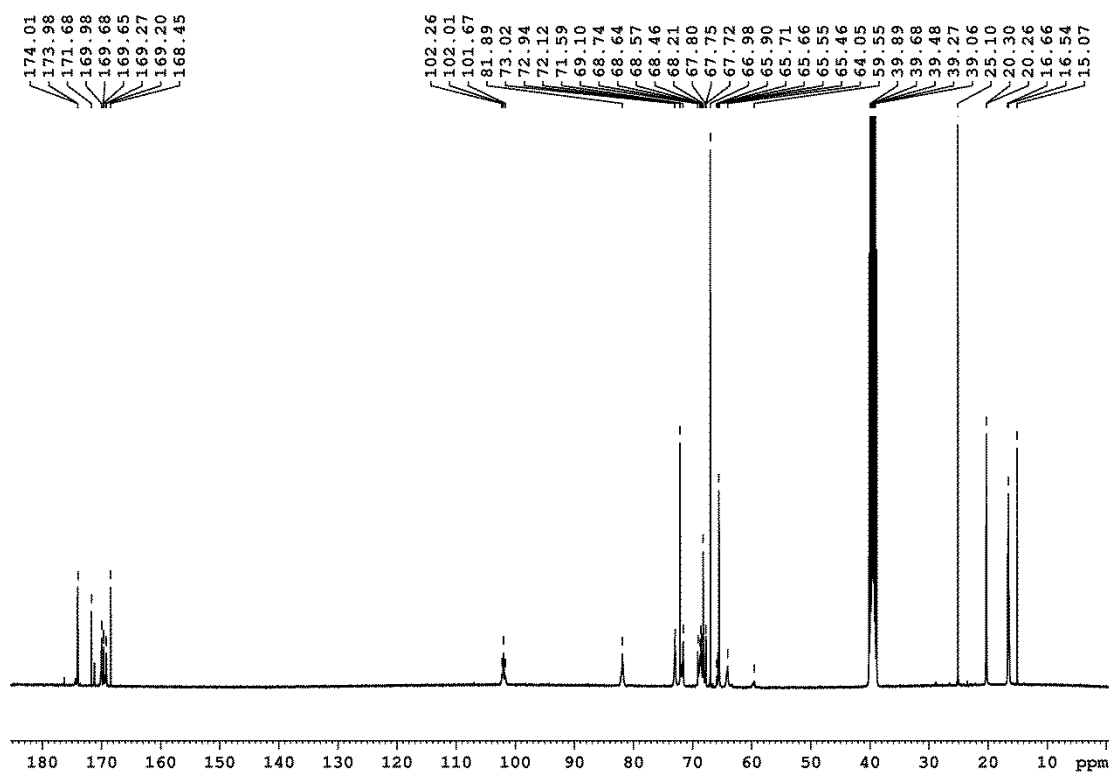

**Figure S42:**  $^{13}\text{C}$  NMR spectrum of  $\alpha$ -CD-LA F2 fraction.



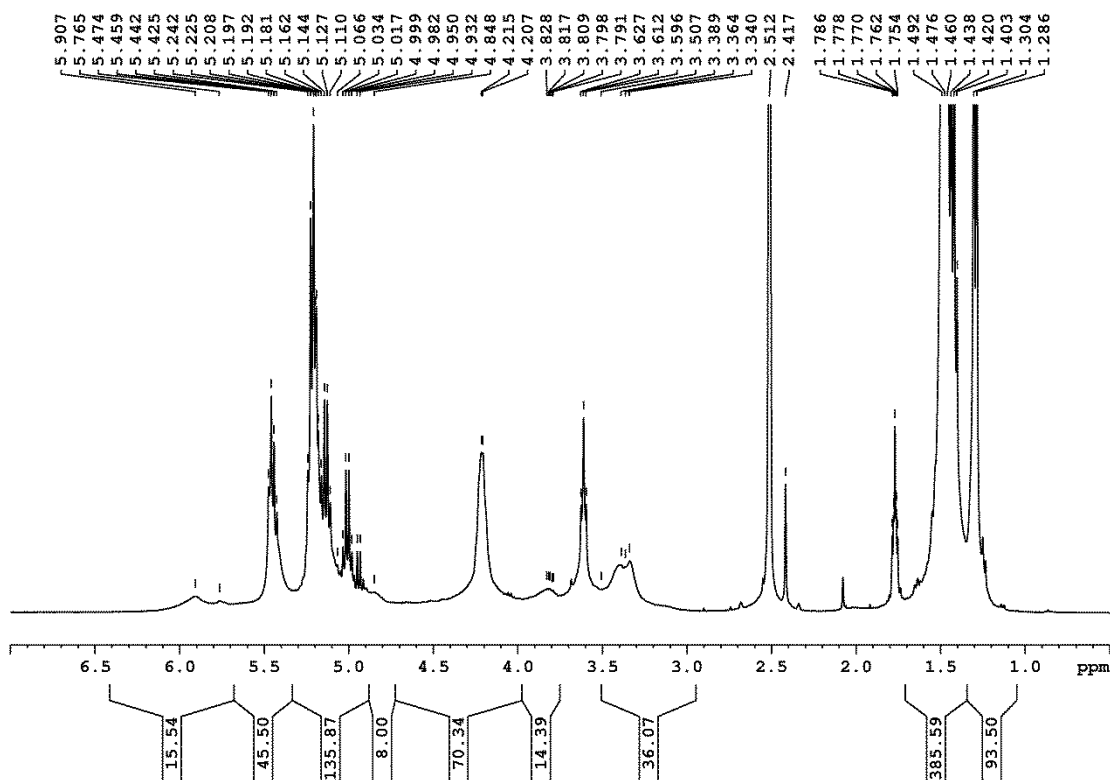

**Figure S43:**  $^1\text{H}$  NMR spectrum of  $\gamma$ -CD-LA F2 fraction.

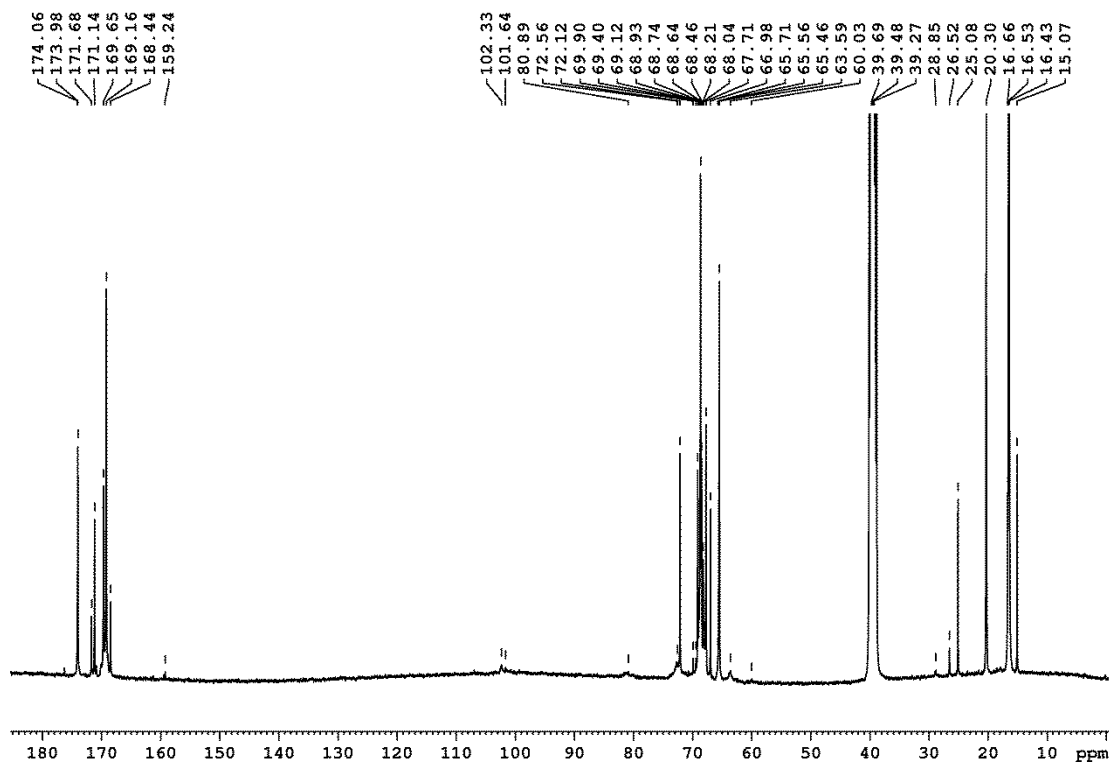

**Figure S44:**  $^{13}\text{C}$  NMR spectrum of  $\gamma$ -CD-LA F2 fraction.
